# Supplementary material for: Genetic variants associated with platelet count are predictive of human disease and physiological markers
Source: PubMed Central journal article supplement (PMC8476563; doi:10.1038/s42003-021-02642-9), 2021-09-27
Supplement: 42003_2021_2642_MOESM1_ESM.pdf [file 42003_2021_2642_MOESM1_ESM.pdf]

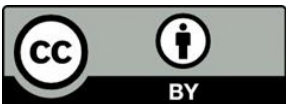

**Open Access** This file is licensed under a Creative Commons Attribution 4.0 International License, which permits use, sharing, adaptation, distribution and reproduction in any medium or format, as long as you give appropriate credit to the original author(s) and the source, provide a link to the Creative Commons license, and indicate if changes were made. In the cases where the authors are anonymous, such as is the case for the reports of anonymous peer reviewers, author attribution should be to 'Anonymous Referee' followed by a clear attribution to the source work. The images or other third party material in this file are included in the article's Creative Commons license, unless indicated otherwise in a credit line to the material. If material is not included in the article's Creative Commons license and your intended use is not permitted by statutory regulation or exceeds the permitted use, you will need to obtain permission directly from the copyright holder. To view a copy of this license, visit <http://creativecommons.org/licenses/by/4.0/>.

Reviewers' comments:

Reviewer #1 (Remarks to the Author):

Overall, an interesting and thorough analysis of platelet count genetics. Some questions remain, however. In general, I still had questions on several parts of the methods and think the authors need to better contextualize their results with the existing GWAS literature in a few places.

1. How was hematological trait filtering performed? Would those with Mendelian disorders have been removed? More description is needed for what was done, and how this is likely to impact GWAS results/implication of Mendelian disease gene variants.
2. Are the traits in Supplementary Table 4 the only hematological diseases tested? What about anemia, thrombocytopenia, etc? Could modest associations observed be in part due to exclusion of phenotypic outliers pre GWAS?
3. How many variants are included as significant that don't meet a conventional GWS threshold like  $1 \times 10^{-9}$ , and could only be identified with your functional variant upweighting scheme? Are these all variants in known loci at least? Why not use a more conservative threshold?
4. How does this list of loci compare to the Vuckovic et al loci identified? When is known variant list from? This isn't clear in Supplemental Table 2.
5. Re Supplementary Table 3... it would also be helpful to know what traits were tested and were NOT significant. Could a list be provided?
6. For this sentence... "with five variants associating with hypertension, one associating with RA and one associating with MPN (Supplementary Table 6)." Are these highly pleiotropic variants, for example in ABO locus? If so I'm not sure how useful this analysis is...
7. How many of the PRS associations are robust to exclusion of MHC region? What causal % parameter was used for the selected score? Could all variants and their weights included in the PRS used be presented in Supplemental Table? How about a table comparing the variance in PLT explained by different score parameter choices (this would be helpful for other people assessing PRS for other quantitative traits)?
8. When you say a gene is implicated in PLT biology or PLT disorders... how defined? More details needed in text. I see supplementary table 7, but am not clear what sources were used. Also what does the "?" mean?
9. How is mapping to genes accomplished for DEPICT and gene set enrichment analysis? It doesn't seem like you are limiting this to genes mapped either via a lead protein coding variant or cis eQTL. Are you? Also, how relevant are cis eQTLs mapped only in non hematopoietic tissues? Do you think these are likely leading you to the right target gene? I think more details/justification are needed here.
10. Any interesting genes in the ones implicated by coding variants, other than those known in PLT disorders? What about genes with high expression in megakaryocytes? Could you assess this systematically using gene expression data from BLUEPRINT or other sources?
11. Minor points on the figures- I would list significance threshold used for plotted variants in Fig 1. legend, and there are some issues with image quality in Fig. 2.

Reviewer #2 (Remarks to the Author):

Mikaelsdottir and colleagues report 577 independent associations in a large well-conducted analysis of 2 populations (Iceland and UK Biobank) along with downstream analyses in regards to polygenic risk scores (PRS), disease associations, eQTLs and pathway enrichments. Multiple testing was adjusted based on functional category. Due to recent large GWAS in the UK Biobank alone for PLT/other cell counts (Vukovic et al) and trans-ethnic GWAS in  $\sim 746K$ , most of the signals in the current paper are not novel, with 4 being reported as novel for PLT. There are some major and a few minor comments for the authors to consider.

1) Discussion should acknowledge that many of these variants are known in the most recent large work and cite Chen et al. Overall there is a lack of discussion of Chen et al. and Vukovic et al. as they covered many of the topics in the current work from different approaches (PRS, genetic correlation with traits, Mendelian variants/bleeding associated variants, etc). Chen et al. is cited but not really discussed and Vukovic et al. is not cited.

2) One of my biggest concerns is that the expression QTL analysis does not include megakaryocytes or platelets. By focusing on traditional GTeX and data from the Icelanders there is a major flaw. The importance of eQTL data in specific cell types is known, and demonstrated in platelets perhaps best by the characterization of a functional SNP in GRK5 that is highly platelet specific as supported by multiple experiments, eQTL analysis and colocalization in different tissues (see Rodriguez et al. PMID 32649586 for more details). There are now several platelet cis-eQTL datasets available, recognizing there may not be perfect overlap in typed/imputed variants to the current study. Most important to check is the eQTL dataset of Kammers et al. (PMID 33094331) which encompassed n=290 platelet samples (and also included megakaryocyte eQTL data on a smaller number of subjects). I suggest you expand the scope of your eQTL analyses to include platelet/MK eQTL data. As demonstrated by the example of GRK5 this approach could be a highly powerful approach, and if some of your findings seem platelet-specific you may also explore megakaryocyte epigenetics data (as Chen et al. showed the enrichment of PLT/MPV signals in MEP lineage cells). I recognize the Kammers et al. paper may have emerged while the authors completed or submitted their work (though there are a few smaller earlier works on platelet cis-eQTL as well).

3) The authors briefly mention there are 4 novel signals in the study (annotated in TableS2). It may be worth describing those briefly (two intergenic, 1 intronic to CAMTA1, one coding variant in ABCA6. On a quick check of Chen et al. sentinel variants (accounting for different genome builds), 3 of these signals had a GWAS significant MPV signal relatively nearby to the current PLT signals. Thus, these may reflect similar signals as noted by others and the authors here due to the PLT/MPV consistent relationship at most loci. The 4th locus an ABCA6 coding variant had nearby associations (3kb) with red cell traits in Chen et al. but interestingly not PLT/MPV.

4) There is not much discussion of the MPN association. It is interesting to note the TERT SNP association here. However, other genes traditionally affecting PLT like JAK2 and MPL are also known to be associated with MPN in clinical cases. I believe there may be more to discuss and unpack here. Were there rare/functional variants in JAK2 and MPL in the dataset and were they not associated with MPN?

5) Hematologic disorders mentioned here seem to involve blood cancers (white cell cancers would not necessarily be expected). What is the scope of disorders examined? (perhaps a list of codes?) Were bleeding and platelet disorders included? What about venous/arterial/cerebro vascular CVD? There is a long-running hypothesis about MPV increase being associated with increased CVD risk (and to some extent high PLT being associated with CVD) though the evidence is mixed. Astle et al. found CVD MR association in the opposite direction to that expected. It is unclear to me if these other disease etiologies would have been addressed in the current analysis. If so, the lack of positive findings may be worth some discussion.

6) The association of PLT with MPV is expected as the authors acknowledge. This is long known as the authors cite to several older papers. It is also illuminated by more recent genetic correlation analyses (i.e., Eicher et al. and Chen et al.). It is unclear how/if red cell correlations were examined. It is mentioned in the Discussion as nothing found but then why are red cell traits not listed in Table S3? Two papers are cited as recent – however, the most up to date and critical is Chen et al. 2020 – see their genetic correlation matrices (their Figure S6B) between blood cell traits where they show stronger PLT to WBC correlation and weak PLT to RBC traits.

7) Table S4 – Inherited platelet disorders – what is your reference? (ISTH Tier 1 Platelet/bleeding

genes/UK PanelApp as rather current) To my knowledge SH2B3 does not belong in inherited platelet disorders. CD36 arguably does not as well since most reported mutations are mild with no effect on bleeding diatheses or hemostasis.

8) Table S7 for platelet biology and platelet disorders seems somewhat incomplete. What is the source? (as above some sources suggested). Further, for platelet function/aggregation you may require an updated search. For instance the very same GRK5 SNP mentioned above associated here with PLT is not given which has evidence of strength similar to PEAR1.

9) Caution is needed in interpreting the PLT PRS as potentially suggesting causal links. Given the numerous loci involved and their complex biology these PRS associations may be driven by non-causal relationships as well as chance and other factors. In particular I find the Hypertension relationship to be one I am skeptical of given the modest effect size and modest association in Icelanders ( $p=0.017$ ). The OR are rather weak in Table S6 by contrast with those of RA/MPN.

#### Minor comments

1) A lot of the later analyses are exploratory data analyses (enrichment, IPA, master regulators). While these can be illuminating there is also some circularity in these types of analyses (i.e., biases of existing databases/literature), and the fact that gene expression levels in specific cell types may drive many of these enrichments, they may be non-specific and categories with a high degree of overlap may not provide granular detail or insights. E.g., the enrichment of spleen associations is not surprising given that the spleen is the primary site of platelet destruction and any spleen or platelet expression dataset will nearly always show a high degree of overlap. At the end of the day I find myself somewhat lost in very large tables of gene lists and there is not a lot of surety about what is truly meaningful (without further experimentation or support). However, as mentioned above and below a few areas may be more interesting (steatosis, cancer, MPN) while others may not be (HTN)

2) Table S5 the note that this is with respect to PLT increasing allele is somewhat buried. The table might be easier to interpret if you also included in the Effects of the PLT trait as well (reinforces the increasing aspect and also allows side by side comparison of effect sizes).

3) In regards to Hepatic Steatosis is interesting to note that some of the predictive models that have been built in the literature include PLT as a covariate. It would be worthwhile to cite these. Likewise, you cannot wholly claim that is a novel link to this paper.

4) In re: to cancer and platelets beyond MPN, it may be worthwhile to read some of the works of Thomas Wurdinger on platelet transcriptomes as biomarkers for cancer types and consider citing some of that work

5) There are some attempts being made to capture published Polygenic Risk Scores to make them more transparent and reproducible due to known issues transferring these PRS across populations and ongoing research in that area. I suggest the authors consider if accepted depositing their PRS in such a resource (or making a clear Supplemental table of the PRS included and PRS calculations)

#### Reviewer #3 (Remarks to the Author):

Review: Platelet count: Sequence variants, its genetic associations with other traits and potential regulatory mechanisms

This manuscript by Mikaelsson et al. presents the results of a large-scale meta-analysis of platelet

count including summary data from GWAS of more than half a million European people. After identifying a large number of independent variants (4 are claimed as novel), the authors characterized potential mechanisms of action via coding variant and cis- expression quantitative trait locus (cis-eQTL) analyses and Data- driven Expression Prioritized Integration for Complex Traits (DEPICT). In addition they employed the Ingenuity Pathway Analysis (IPA) to look for enrichment of effects by pathway. Finally, they compared the predictive value of a polygenic risk score for platelet count among an array of additional available phenotypes. Overall, this paper represents a well-powered analysis coupled with hypothesis-generating downstream functional analyses that are likely to be of interest to the field.

#### Major comments:

1. This article needs a "table 1" summarizing the demographic information and platelet related measurements in each dataset for all included individuals.
2. The authors do not mention inclusion and exclusion criteria of subjects. Platelet counts could be greatly affected by variety of disease conditions and medications.
3. The effect of relatedness in the association tests from the genotypically imputed 1st and 2nd degree Icelanders should be explored more- it would be helpful to have one more column in supplemental table 2 to list the p-value from genotyped-Icelander-only, as a sensitivity analysis.
4. The author use the meta-analysis results to calculate the PLT PRS- additional details are warranted here. How good is the PLT PRS? AUC? What is the correlation between PLT and PLT PRS?
5. The authors identified 24 traits that are correlated with PLT PRS, how does this compare with the phenotypic correlation with the original measured PLT?
6. Given the likely high correlation of phenotypes, this portion of the study would be better powered if significance was achieved through permutation, rather than using bonferonni for multiple test corrections.
7. The authors also ran the single variant association test for the 577 PLT SNPs on the identified 24 traits. It would be interesting to also run the regression adjusting the original PLT measures in order to see the genetic effect separately from the phenotypic correlation.
8. Although authors state there is not significant heterogeneity in Icelander and UK Biobank, some p values are large in Icelanders but small in UK Biobank (UKB). For example, rs964184 (supplementary table 2) has p value of  $1.9E-3$  in Icelander and  $1.8E-25$  in UKB. Are such significant meta-analysis results driven by UKB data?
9. The authors should provide figures demonstrating that their test statistics are behaving appropriately given the complex relatedness structures and genotype imputation procedures which may introduce bias- the correction factor for case-control phenotypes which were found to coorelate with the PLT PRS are given, but it would be useful to have more information about any inflation seen in the primary GWAS/Meta analyses.

#### Minor comments:

1. Filtering criteria of imputation information over 0.8 and 0.7 were applied to Iceland and UK Biobank dataset respectively. What is the effect of these differing thresholds on low MAF ( $< 1\sim 2\%$ ) in Iceland data?
2. The 4 novel PLT loci, should be better highlighted and specifically described. Did any of these show compelling associations with related traits?
3. IPA method is a bit of a black box (disclosure- I'm not a fan of this method, but am trying to set aside my bias here) and provides a network association rather than real causality. A formal causality test would be appropriate and potentially informative for the highlighted networks of interest.

Reviewers' comments:

Reviewer #1 (Remarks to the Author):

Overall, an interesting and thorough analysis of platelet count genetics. Some questions remain, however. In general, I still had questions on several parts of the methods and think the authors need to better contextualize their results with the existing GWAS literature in a few places.

1. How was hematological trait filtering performed? Would those with Mendelian disorders have been removed? More description is needed for what was done, and how this is likely to impact GWAS results/implication of Mendelian disease gene variants.

A: As stated in Methods, the Icelandic data included all measurements made in laboratories of the three main health care centers of Iceland in the period from 1993 to 2015. The UK data included all participants of genetically confirmed white British ancestry. All participants gave their written consent. In other words, the only inclusion criteria were: 1. Available platelet count measurements, 2. Available genetic data, 3. Written consent, and 4. For UK participants, confirmed white British ancestry. No other inclusion or exclusion criteria were applied with regards to study participants, and individuals with Mendelian disorders were not excluded from the analysis. They would however only be a very small fraction of the number of individuals included in the analysis and their impact on the association analysis would thus be very small if any. Especially as the trait values were inverse normal transformed prior to the analysis to diminish the impact of outliers.

This has now been stated in the revised version of the manuscript in the Methods section where the datasets are described (lines 371-375). The addition sounds as following: In summary, the only inclusion criteria in either population were: 1. Available platelet count measurements, 2. Available genetic data, 3. Written consent, and 4. For UK participants, confirmed white British ancestry. No other inclusion or exclusion criteria were applied with regards to study participants, and individuals with Mendelian disorders were not excluded from the analysis.

2. Are the traits in Supplementary Table 4 the only hematological diseases tested? What about anemia, thrombocytopenia, etc? Could modest associations observed be in part due to exclusion of phenotypic outliers pre GWAS?

A: Anemia, thrombocytopenia and hematologic diseases other than those listed Supplementary Table 4 were not analyzed for several reasons. First of all, some of the cohorts were too small to allow robust analysis. Secondly, some other cohorts were defined using different criteria in the two populations and therefore were not comparable. In some other cases, such as thrombocytopenia, there was no information on whether diagnosis was primary or secondary thrombocytopenia or both. We performed analysis of only those hematologic diseases where cohorts were defined in the same way, that is, data coming from the Cancer Registry of Iceland and the UK and diagnosis confirmed by pathologists. This has now been clarified in the Methods section, in the part where we describe Polygenic risk score and phenotype correlation analyses (lines 520-522). The addition sounds as following: With regards to hematologic diseases, we performed analysis of only those four hematologic diseases (Supplementary Table 4) where cohorts were defined in the same way, that is, data coming from the Cancer Registry of Iceland and the UK and diagnosis confirmed by pathologists.

Since the outliers/Mendelian disorder cases were not excluded, this is not likely to explain the observation of modest association.

3. How many variants are included as significant that don't meet a conventional GWS threshold like  $1 \times 10^{-9}$ , and could only be identified with your functional variant upweighting scheme? Are these all variants in known loci at least? Why not use a more conservative threshold?

A: The most commonly used GWS threshold is  $5 \times 10^{-8}$ , a threshold derived 15 years ago when much fewer variants were tested. Only recently some studies have started to use a more reasonable threshold like  $5 \times 10^{-9}$  (e.g. studies by Chen *et al* (PMID: 32888493) and Vuckovic *et al* (PMID: 32888494)). We actually use an even more stringent threshold, a Bonferroni adjustment for the number of tests performed, which in the case of our study is  $p < 0.05/50,177,681$ . The functional variant reweighting, which we apply, preserves that Bonferroni family wise error rate, i.e while functional variants are more likely to be causal and have to meet a less stringent significance threshold, most variants tested have to meet an even more stringent threshold of  $p < 4.8 \times 10^{-10}$ . Detailed justification for use of class-specific genome-wide significance thresholds is provided in Sveinbjornsson *et al* (PMID: 26854916).

In our study there are 19 variants whose P value is  $> 1 \times 10^{-9}$ , one of which is rs2315552, highly correlated with previously reported variant with ( $r^2 > 0.9$ ) and represents the only signal in the region. The variants are all in or near known loci. As an example, one of these 19 variants is rs12731981, a missense in *MPL*. For details, see the table below.

If we consider significance thresholds applied in recent studies by Chen *et al* (PMID: 32888493) and Vuckovic *et al* (PMID: 32888494), where the applied significance threshold in meta-analyses was  $p < 5 \times 10^{-9}$ , there are only four variants (labeled with \* in the table below) with adjusted p-value  $> 5 \times 10^{-9}$ . Three of these four variants are missense and one is splice acceptor.

**Variants with adjusted P > 1E-09. Associations with adjusted P > 5E-09 are labeled with \*. All the variants have adjusted p-value < 5E-08, the commonly used GWS threshold.**

| SNP*        | Comment                                        | Reported SNP(s)                   | Reference(s) (PMID)          | Explanatory Note                                                                                                                                                                                                                                                                                              |
|-------------|------------------------------------------------|-----------------------------------|------------------------------|---------------------------------------------------------------------------------------------------------------------------------------------------------------------------------------------------------------------------------------------------------------------------------------------------------------|
| rs12731981  | Previously reported                            | rs12731981                        | 32888494                     |                                                                                                                                                                                                                                                                                                               |
| rs138843544 | Previously reported                            | rs138843544                       | 32888494                     |                                                                                                                                                                                                                                                                                                               |
| rs17580     | Previously reported                            | rs17580                           | 27863252, 32888493           |                                                                                                                                                                                                                                                                                                               |
| rs3841260   | Previously reported                            | rs3841260                         | 27863252                     |                                                                                                                                                                                                                                                                                                               |
| rs8050500   | Previously reported                            | rs8050500                         | 32888493, 32888494           |                                                                                                                                                                                                                                                                                                               |
| rs1143671*  | Correlated with reported, R <sup>2</sup> > 0.8 | rs9815756                         | 32888494                     |                                                                                                                                                                                                                                                                                                               |
| rs8565*     | Correlated with reported, R <sup>2</sup> > 0.8 | rs17685                           | 32888494                     |                                                                                                                                                                                                                                                                                                               |
| rs2315552   | Correlated with reported, R <sup>2</sup> > 0.8 | rs1476835, rs917665               | 32888493, 32888494           |                                                                                                                                                                                                                                                                                                               |
| rs480243    | Correlated with reported, R <sup>2</sup> > 0.7 | rs7990306                         | 32888493                     |                                                                                                                                                                                                                                                                                                               |
| rs3114409*  | Correlated with reported, R <sup>2</sup> > 0.6 | rs3049697                         | 32888494                     |                                                                                                                                                                                                                                                                                                               |
| rs667555    | Correlated with reported, R <sup>2</sup> > 0.5 | rs139892606                       | 32888494                     |                                                                                                                                                                                                                                                                                                               |
| rs562344339 | Correlated with reported, R <sup>2</sup> ≈ 0.2 | rs572476245                       | 32888494                     | It is a rare variant (MAF < 0.5% in either population) near the <i>THPO</i> gene, unadjusted P= 6.1E-35/adjusted P= <b>1.4E-09</b> .                                                                                                                                                                          |
| rs1047440   | No correlation with previously reported        | rs6892249                         | 32888493                     | Unadjusted P= 1.3E-09/adjusted P = <b>1.8E-09</b> .                                                                                                                                                                                                                                                           |
| rs3735485*  | No correlation with previously reported        | rs2331174                         | 27863252, 32888493           | rs3735485 is a missense variant representing a conditionally independent signal at the locus with unadjusted P=2.7E-09/adjusted P= <b>6.3E-09</b> . At this locus, we have also identified a signal with the lead SNP rs11762008 that is highly correlated with the reported rs2331174 (R <sup>2</sup> =1).   |
| rs35858667  | No correlation with previously reported        | rs7833924                         | 27863252, 32888493, 32888494 | rs35858667 is a missense variant representing a conditionally independent signal at the locus with unadjusted P=4.4E-25/adjusted P = <b>1.4E-09</b> . At this locus, we have also identified a signal with the lead SNP rs11993233 that is highly correlated with the reported rs7833924 (R <sup>2</sup> =1). |
| rs35741412  | No correlation with previously reported        | rs368770339, rs7950696, rs7124681 | 27863252, 32888493, 32888494 | rs35741412 is a missense variant representing a conditionally independent signal at the locus with unadjusted P= 4.3E-14/adjusted P = <b>2.6E-09</b> . At this locus, we have also identified a signal with the lead SNP rs3817334 that is highly correlated with the reported rs7124681 (R <sup>2</sup> =1). |



|             |                                         |                                                                               |                                                  |                                                                                                                                                                                                                                                                                                                                               |
|-------------|-----------------------------------------|-------------------------------------------------------------------------------|--------------------------------------------------|-----------------------------------------------------------------------------------------------------------------------------------------------------------------------------------------------------------------------------------------------------------------------------------------------------------------------------------------------|
| rs149678861 | No correlation with previously reported | rs8035677, rs12911407, rs61009920, rs1719271, rs1522744, rs1002311, rs1631677 | 22139419, 27863252, 29403010, 32888493, 32888494 | rs149678861 represents a rare (MAF < 1% in either population) conditionally independent signal at the locus with unadjusted P=3.7E-10/ adjusted P= <b>1.1E-09</b> . The reported SNPs are highly correlated (R <sup>2</sup> ranging from 0.84 to 1) with rs141601939 and rs1719263, two other signals identified in this region in our study. |
| rs375677    | No correlation with previously reported | rs708382, rs850736, rs34603233, rs150568286                                   | 22139419, 27863252, 32888493, 32888494           | rs375677 represents a conditionally independent signal at the locus with unadjusted P=2E-13/adjusted P = <b>1.1E-09</b> . In this region, near the <i>ITGA1B</i> gene, we have also identified signals with the same lead SNPs as reported in the region (rs34603233 and rs150568286).                                                        |
| rs113906245 | No correlation with previously reported | rs34536443, rs553314025, rs1865065, rs2360742                                 | 27863252, 29403010, 32888493, 32888494           | rs113906245 represents a conditionally independent signal at the locus with unadjusted P=4.1E-10/ adjusted P = <b>2.4E-09</b> . At this locus, we have also identified a signal with the same lead SNP as reported in the region (rs34536443).                                                                                                |

4. How does this list of loci compare to the Vuckovic et al loci identified? When is known variant list from? This isn't clear in Supplemental Table 2.

A: Of the 577 identified signals, 192 are represented by the same lead SNP as in the study by Vuckovic *et al* (PMID: 32888494). In addition, 235 variants are located within the 25 kb range from the variants identified in that study. Only 72 of 577 are located in the range 100kb or more away from the variants identified by Vuckovic *et al*.

The list of known variants, which our results were compared to, includes all variants reported in GWAS of platelet count, based on data from the GWAS catalog (<https://www.ebi.ac.uk/gwas/>). As for the initially submitted manuscript, the date of last access was November 13, 2020. In the revision, the date of access was May 26, 2021. The origin of the known variants list is now clarified in the manuscript text (lines 85-86), as well as in the **Supplementary Table 2** legend. The revised version in the manuscript text sounds as following: Three of the signals are located  $\geq 1$ Mb away from the nearest known PLT variant reported in the GWAS catalog as of May 26, 2021 (note § in **Supplementary Table 2**), indicating novel PLT loci. The addition to the Supplementary Table 2 legend sounds as following: § A variant located  $\geq 1$ Mb away from the nearest known PLT variant reported in the GWAS catalog as of May 26, 2021.

5. Re Supplementary Table 3... it would also be helpful to know what traits were tested and were NOT significant. Could a list be provided?

A: As mentioned in Methods and in the main text, in the polygenic risk score part of the study, we tested 5,000 traits representing the majority of common human diseases (coronary artery disease, type 2 diabetes, various cancers etc) as well as various quantitative traits.

We had data on thousands of phenotypes. For example, there were more than 3,300 quantitative traits from the UK (presenting various lab measurements, various data for brain and its specific areas, ECG, measurements of body size and its different parts, metabolic rates speech reception, birth weight and so on), more than 3,400 presenting various ICD codes, 39 lists from Cancer Registry, as well as data based on CISR and NCISR codes. 5,000 traits were considered to have a matching phenotype in the other cohort, therefore the threshold was set at  $1E-05$  (0.05/5,000). The great majority of the phenotypes was not significantly associated with the PLT PRS. Only significant results are presented in the manuscript, as presenting the rest would be quite laborious. In the revised version, we included a clarification paragraph in the Methods section, in the part where we describe the Polygenic risk score and phenotype correlation analyses (lines 512-522).

6. For this sentence... “with five variants associating with hypertension, one associating with RA and one associating with MPN (Supplementary Table 6).” Are these highly pleiotropic variants, for example in ABO locus? If so I'm not sure how useful this analysis is...

A: This sentence just summarizes which variants associate with the PLT PRS correlated diseases. While the variants are pleiotropic, for the sake of the paper's content only their association with the phenotypes correlated with the PLT PRS is emphasized.

7. How many of the PRS associations are robust to exclusion of MHC region? What causal % parameter was used for the selected score? Could all variants and their weights included

in the PRS used be presented in Supplemental Table? How about a table comparing the variance in PLT explained by different score parameter choices (this would be helpful for other people assessing PRS for other quantitative traits)?

A: This is a great question. We have repeated the analysis excluding the MHC region, and the results are now presented in **Supplementary Table 5**. Of the diseases that associate with the PLT PRS, association of ankylosing spondylitis and benign prostate hyperplasia are obviously driven by the MHC. However, association of hypertension and myeloproliferative neoplasms with the PLT PRS is not dependent on the MHC, whereas association of rheumatoid arthritis with the PLT PRS depends to some extent on the MHC, albeit not entirely. A description of these results is now also included in the manuscript text (lines 125-132). The addition sounds as following: To analyze the effect of the MHC region on association of the PLT PRS with these traits, we removed the variants, representing the MCH in the polygenic risk core calculations, and recalculated the association of the PLT PRS with these traits (**Supplementary Table 5**). Exclusion of the MHC revealed that the PLT PRS association with ankylosing spondylitis, benign prostate hyperplasia and cholesterol is dependent on the MHC region. While association with rheumatoid arthritis is strongly affected by the MHC region, the MHC does not fully explain association of the PLT PRS with rheumatoid arthritis. At the same time, exclusion of the MHC strengthened the PLT PRS association with hypertension, MPV, heart rate, alkaline phosphatase, and bilirubin (**Supplementary Table 5**).

For UKB the optimal model assumed 3% causal variants, but for Iceland the infinitesimal model in LDpred fitted best. The PRS are based on 600,000 variants which is too big to include as a supplementary table, but we could include the weights in a data release together with the meta-analysis results. The variance explained for the different models (fraction of causal variants) we tested in LDpred is presented in the table below and has been added as **Supplementary Table 24**.

**Fraction of variance of PLT measurements explained by PLT-PRS scores created based on different re-weighting models in LDpred.**

| Model <sup>a</sup> | UKB   | Iceland |
|--------------------|-------|---------|
| Unweighted         | 4.4%  | 7.5%    |
| 1                  | 6.0%  | 9.2%    |
| 0.3                | 7.1%  | 7.6%    |
| 0.1                | 9.0%  | 6.1%    |
| 0.03               | 10.9% | 5.5%    |
| 0.01               | 3.2%  | 5.4%    |
| 0.003              | 1.5%  | 3.9%    |
| 0.001              | 1.5%  | 4.2%    |
| Infinitesimal      | 7.5%  | 11.9%   |

<sup>a</sup>Assumed fraction of causal variants in the LDpred model used.

8. When you say a gene is implicated in PLT biology or PLT disorders... how defined? More details needed in text. I see supplementary table 7, but am not clear what sources were used. Also what does the “?” mean?

A: Implication in platelet disorders was based on information from the Online Mendelian Inheritance in Man database (OMIM, [www.omim.org](http://www.omim.org)) and confirmed through literature search. All gene names in the column “Gene Symbol - human (HUGO / HGNC / Entrez Gene)” in the new **Supplementary Table 16** were included in the search.

Selection of genes with roles in platelet biology was also based on results of search in OMIM and published literature. Criteria included evidence of biological functions, such as animal models that exhibit a platelet-related phenotype (preferably affecting number of platelets).

With respect to the four genes in the original **Supplementary Table 7** (now **Supplementary Table 8**), which do not have the OMIM phenotype numbers but were listed as having functions in platelets (ERG, NFE2, PEAR1, and ZFPM1/FOG1), three of them are transcription factors (TFs) and cofactors of known TFs, which are involved in megakaryopoiesis and implicated in platelet disorders, e.g. GATA1 (OMIM # 300367 and 300835), FLI1 (OMIM # 617443), and RUNX1 (OMIM # 601399). Furthermore, there is supporting evidence for these three TFs (ERG, NFE2, and ZFPM1/FOG1) in megakaryopoiesis/platelet biology coming from mouse models and/or studies of human subjects. Evidence for PEAR1 is not as solid as for ERG, NFE2 and ZFPM1/FOG1, but it is still based on several studies, including a zebrafish model.

To avoid ambiguity in definition of essential platelet genes, it was decided to limit the platelet gene list (new **Supplementary Table 8**) in the revised version only to those genes that have been implicated in human platelet-related disorders (preferably where platelet count is affected) with assigned OMIM phenotype numbers. This excludes the four genes discussed above.

Corresponding corrections and clarifications were added to the revised version of the manuscript, in the text (lines 154-157) and in the legends of **Supplementary Tables 2, 8, 9** and **16**. The revised text (lines 154-157) sounds as following: Only 38 out of the 577 variants are located in or near genes implicated in platelet disorders (**Supplementary Tables 2** and **8**) defined based on information from the Online Mendelian Inheritance in Man database (OMIM, [www.omim.org](http://www.omim.org)) and confirmed through literature [search](#).

“?” has been removed.

9. How is mapping to genes accomplished for DEPICT and gene set enrichment analysis? It doesn't seem like you are limiting this to genes mapped either via a lead protein coding variant or cis eQTL. Are you? Also, how relevant are cis eQTLs mapped only in non hematopoietic tissues? Do you think these are likely leading you to the right target gene? I think more details/justification are needed here.

A: In DEPICT, we analyzed all 577 variants identified in our meta-analysis of PLT GWAS. We applied default settings in DEPICT where all SNPs with LD > 0.5 with respect to the PLT lead SNPs in each locus are included in the analysis, with no additional adjustments or modifications of gene mapping. For details on the DEPICT method, please refer to Pers *et al* (PMID: 25597830). This clarification has been added to the Methods section in the revised version of the manuscript (lines 527-529) and sounds as following: We analyzed all 577 variants identified in our meta-analysis of PLT GWAS. We applied default settings in DEPICT, where all SNPs with LD > 0.5 with respect to the PLT lead SNPs in each locus are included in the analysis, with no additional adjustments or modifications of gene mapping.

Even though a cis-eQTL maps only in non-hematopoietic tissue, it can still be of relevance. For example, an encoded molecule can play a role in control of platelet count (e.g.

thrombopoietin, which is expressed by kidney and liver), or in recruiting platelets and/or targeting them to specific sites (e.g. adhesion molecules in endothelium). Therefore, it can be argued that it is reasonable to analyze all eQTLs, even if they map only in non-hematopoietic tissues. This clarification has been added (lines 600-602) and sounds as following: We analyzed all tissues, defined as significant by DEPICT, including non-hematopoietic ones, since they can also be relevant to control of PLT (e.g. liver and kidney, major production sites of thrombopoietin).

10. Any interesting genes in the ones implicated by coding variants, other than those known in PLT disorders? What about genes with high expression in megakaryocytes? Could you assess this systematically using gene expression data from BLUEPRINT or other sources?

A: Of 115 signals represented by coding variants or variants highly correlated with coding variants, 85 are located in genes expressed in megakaryocytes and/or platelets, based on expression data from platelets and megakaryocytes from Kammers *et al* (PMID: 33094331) and expression data from platelets from Londin *et al* (PMID: 24524654), with 18 of them mapping to genes implicated in platelet-related disorders. The remaining 30 variants are located in 29 genes that do not have a record of expression in these two cell types. However, several of them are noteworthy: ABCA6, APOH, GCKR, TM6SF2, IRF1, and PNPLA3 that are implicated in cholesterol/lipid homeostasis. By analogy with ABCG4 (Murphy *et al*, (PMID: 23584088)), they could function both in platelet count regulation and control of cholesterol/lipid homeostasis. Alternatively, by modifying cholesterol/lipid homeostasis they might create a pro-inflammatory environment that leads to increase in platelet production. Interestingly, all these genes are expressed in liver, with three being linked to non-alcoholic fatty liver disease (see **the table below**). Further experimental evidence is required to elucidate their role in both regulation of PLT and control of lipid metabolism/homeostasis. This description has been included in the Results section of the revised version of the manuscript, where we discuss pathway and tissue enrichment analyses and search for causal genes (lines 165-176), as well as a new **Supplementary Table 11**.

Genes not expressed in platelets or megakaryocytes and harboring coding PLT variants with functions in cholesterol/lipid homeostasis and non-alcoholic fatty liver disease. Added as a new **Supplementary Table 11**.

| Gene  | Known functions in cholesterol/lipid homeostasis and non-alcoholic fatty liver disease                                                                                                                                                                                                                                                                                                                                                                                                                                                                       | References (PMID)                                                    |
|-------|--------------------------------------------------------------------------------------------------------------------------------------------------------------------------------------------------------------------------------------------------------------------------------------------------------------------------------------------------------------------------------------------------------------------------------------------------------------------------------------------------------------------------------------------------------------|----------------------------------------------------------------------|
| ABCA6 | ABCA6 belongs to the ATP-binding cassette transporter family, it is cholesterol-responsive and potentially involved in intracellular lipid transport processes. Variants in the gene have been associated with blood lipids in GWAS but not with PLT. No record of expression in platelets or megakaryocytes, although broadly expressed in other tissues, including <i>liver</i> (GTEx).                                                                                                                                                                    | 11478798, 24028821, 24524654, 25751400, 25961943, 33094331           |
| APOH  | APOH encodes beta-2 glycoprotein I, also known as apolipoprotein H, a single-chain plasma protein and a component of circulating plasma lipoproteins. Beta-2 GPI has been implicated in a variety of physiologic pathways, including blood coagulation, hemostasis, and the production of antiphospholipid antibodies characteristic of antiphospholipid syndrome. Variants in the gene have been associated with blood lipids in previous GWAS. Restricted expression towards <i>liver</i> (GTEx), no records of expression in platelets or megakaryocytes. | 15507263, 24097068, 24524654, 29507422, 30275531, 30698716, 33094331 |

|               |                                                                                                                                                                                                                                                                                                                                                                                                                                                                                                                                                                                                                                                                               |                                                                                                                                  |
|---------------|-------------------------------------------------------------------------------------------------------------------------------------------------------------------------------------------------------------------------------------------------------------------------------------------------------------------------------------------------------------------------------------------------------------------------------------------------------------------------------------------------------------------------------------------------------------------------------------------------------------------------------------------------------------------------------|----------------------------------------------------------------------------------------------------------------------------------|
| <i>GCKR</i>   | The protein encoded by <i>GCKR</i> belongs to the GCKR subfamily of the Sugar Isomerase family of proteins. The gene product is a regulatory protein that inhibits glucokinase in liver. In addition to diabetes, variants in the gene have been associated with <b><u>non-alcoholic fatty liver disease</u></b> in GWAS and multiple variants were found to associate with blood lipids. Expressed in several tissues with very abundant expression in <b><u>liver</u></b> (GTEx) and no record of expression in platelets and megakaryocytes.                                                                                                                               | 17463246, 19936222, 24524654, 25692341, 25961943, 29385134, 33094331                                                             |
| <i>IRF1</i>   | The protein encoded by <i>IRF1</i> is a transcriptional regulator and tumor suppressor, serving as an activator of genes involved in immune responses and associated with cancers. It also plays a role in transcriptional regulation of APOL1, a component of high-density lipoprotein particles. Variants in the gene have been associated with blood lipids in previous GWAS. Expressed in various tissues including <b><u>liver</u></b> (GTEx) with no record of expression in platelets and megakaryocytes.                                                                                                                                                              | 24524654, 29083408, 29507422, 29599126, 30275531, 32671843, 33094331, 33476326                                                   |
| <i>PNPLA3</i> | The protein encoded by <i>PNPLA3</i> is also known as adiponutrin and associates with endoplasmic reticulum and lipid droplet membranes. It is an enzyme with lipase activity towards triglycerides and retinyl esters, and acyltransferase activity on phospholipids and may be involved in regulation of energy homeostasis. Variants in the gene have been associated with <b><u>non-alcoholic fatty liver disease</u></b> and blood lipids in GWAS. Expressed in <b><u>liver</u></b> and several other tissues (GTEx) with no record of expression in platelets or megakaryocytes.                                                                                        | 11431482, 21423719, 22719876, 23535911, 24524654, 26690388, 28334899, 29385134, 29507422, 29935383, 30275531, 33094331, 33339817 |
| <i>TM6SF2</i> | <i>TM6SF2</i> is a multi-pass membrane protein. Its inhibition is associated with reduced secretion of triglyceride-rich lipoproteins and increased cellular triglyceride concentration and lipid droplet content, whereas its overexpression reduces liver cell steatosis. A missense variant in <i>TM6SF2</i> (Glu167Lys), which has been associated with increased risk for <b><u>non-alcoholic fatty liver disease</u></b> and with blood lipids in a GWAS induces increased hepatocyte fat content by reducing APOB particle secretion. Expressed mainly in small intestine and <b><u>liver</u></b> (GTEx), with no record of expression in platelets or megakaryocytes. | 24524654, 24531328, 24927523, 25961943, 31406127, 33094331                                                                       |

---



11. Minor points on the figures- I would list significance threshold used for plotted variants in Fig 1. legend, and there are some issues with image quality in Fig. 2.

A: The significance threshold has been added to **Fig.1** legend (lines 867-868). The revised version sounds as following: **Fig. 1.** Overview of association of the PLT variants with other quantitative traits (significance criteria:  $p \leq 3.6 \times 10^{-6}$  (**Methods**)). The image quality of **Fig.2** has been improved.

**Updated Fig. 2.**

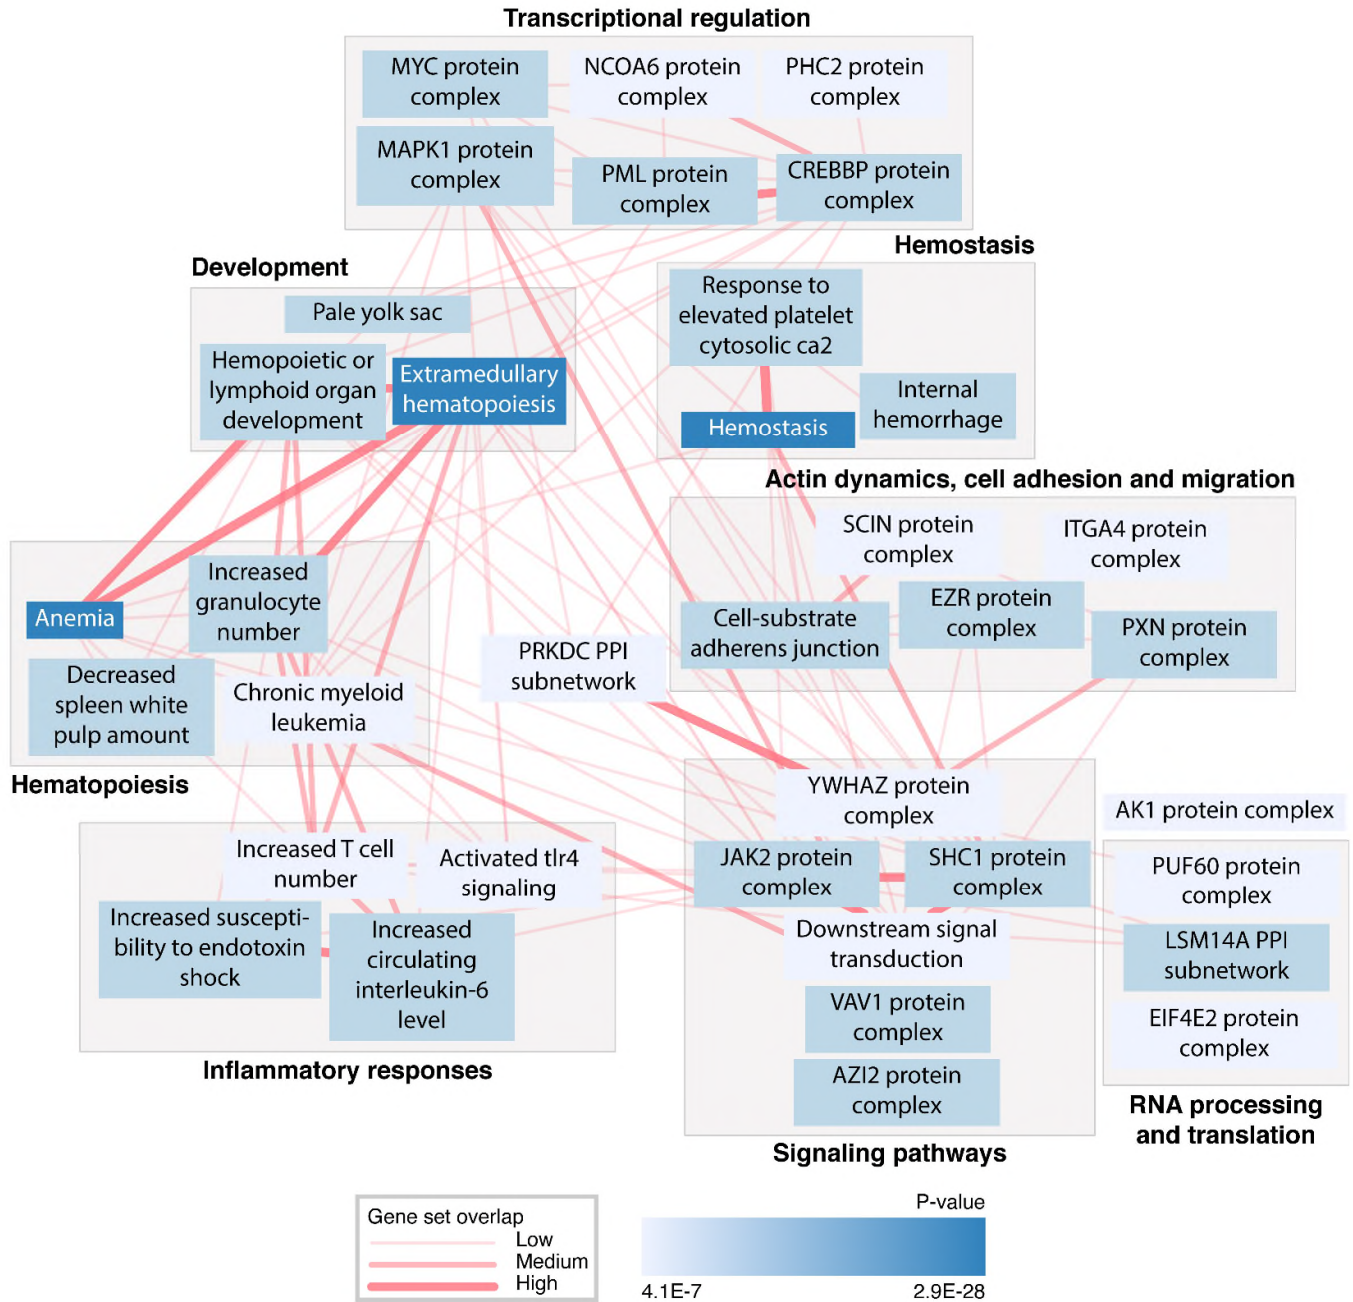

Reviewer #2 (Remarks to the Author):

Mikaelsdottir and colleagues report 577 independent associations in a large well-conducted analysis of 2 populations (Iceland and UK Biobank) along with downstream analyses in regards to polygenic risk scores (PRS), disease associations, eQTLs and pathway enrichments. Multiple testing was adjusted based on functional category. Due to recent large GWAS in the UK Biobank alone for PLT/other cell counts (Vukovic et al) and trans-ethnic GWAS in ~746K, most of the signals in the current paper are not novel, with 4 being reported as novel for PLT. There are some major and a few minor comments for the authors to consider.

1) Discussion should acknowledge that many of these variants are known in the most recent large work and cite Chen et al. Overall there is a lack of discussion of Chen et al. and Vukovic et al. as they covered many of the topics in the current work from different approaches (PRS, genetic correlation with traits, Mendelian variants/bleeding associated variants, etc). Chen et al. is cited but not really discussed and Vukovic et al. is not cited.

A: In the revised version, we have added a discussion of the publications by Chen *et al* (PMID: 32888493) and Vukovic *et al* (PMID: 32888494) that highlights their findings and approaches in comparison to our discoveries (lines 298-314).

Specifically, if our manuscript is compared to the study by Chen *et al*, it becomes clear that although we work on similar topics, the approaches are different, as well as questions addressed, and most of the results are not overlapping, contradicting or redundant. Chen *et al* do an impressive job addressing issues of ethnicity with focus on hematopoietic tissues, whereas we did not restrict our analyses to hematopoietic tissues only, for reasons discussed in our response to Major Comment 2 below. Furthermore, while Chen *et al* look at chromatin states in hematopoietic cell types, we look at the consequences in form of altered gene expression with speculation on how the differential expression of the genes in our dataset could potentially lead to observed outcomes (e.g. diseases associated with the PLT PRS). With regards to the polygenic risk score/polygenic trait score part, Chen *et al* restricted these analyses to variant-trait associations that reached genome-wide significance ( $p < 5 \times 10^{-9}$ ) in trans-ethnic MR-MEGA meta-analysis, while we constructed our PRS based on 600,000 variants representing the whole genome without exclusion of any specific region. Chen *et al* tested their score in prediction of hematological disorders, while we tested ours in terms of prediction of various diseases and traits, not only hematopoietic ones.

The same is true when our study is compared to the impressive work and interesting results presented by Vukovic *et al* in their study. Their cohort includes 563,085 Europeans, which is of a similar size to ours. They explored associations with 29 blood cell phenotypes. The only eQTLs considered were the ones in blood cell types, as opposed to multiple tissues in our study, and these data were used for a different purpose than in our study. Majority of findings in the core gene analysis are related to hematopoiesis and/or hematologic disorders. Like Chen *et al*, they also looked at chromatin states in hematopoietic cell populations and how the variants may affect human transcription factor motifs, while we were interested to analyze consequences in terms of altered gene expression in our dataset with regards to outcomes, e.g. the PLT PRS associated diseases. Vukovic *et al* analyzed clinical impact of rare variants, while we evaluated association of all 577 genome-wide significant variants with all traits associated with the PLT PRS. They constructed PRS with 135-689 variants depending on the trait and used them to evaluate portability of the PRS across European populations and to look at association with rare blood disorders, while we constructed ours based on 600,000 variants representing the whole genome and analyzed associations with phenotypes representing the majority of common diseases and traits. They looked if multiple sentinel at a single locus could underlie associations with complex disease, where they took blood trait



loci with 2+ sentinels and overlapped those regions with colocalization results for 18 common human diseases, which is also a different approach from ours. Furthermore, the results of this colocalization with 18 common diseases, which are presented in Fig. 5E in their paper, are not specific for platelets, but rather represent colocalization with at least one locus associated with any of the blood cell counts.

As mentioned above, a paragraph summarizing these points have been added to the **Discussion** section of the revised version.

2) One of my biggest concerns is that the expression QTL analysis does not include megakaryocytes or platelets. By focusing on traditional GTeX and data from the Icelanders there is a major flaw. The importance of eQTL data in specific cell types is known, and demonstrated in platelets perhaps best by the characterization of a functional SNP in GRK5 that is highly platelet specific as supported by multiple experiments, eQTL analysis and colocalization in different tissues (see Rodriguez et al. [PMID 32649586](#) for more details). There are now several platelet cis-eQTL datasets available, recognizing there may not be perfect overlap in typed/imputed variants to the current study. Most important to check is the eQTL dataset of Kammers et al. (PMID 33094331) which encompassed n=290 platelet samples (and also included megakaryocyte eQTL data on a smaller number of subjects). I suggest you expand the scope of your eQTL analyses to include platelet/MK eQTL data. As demonstrated by the example of GRK5 this approach could be a highly powerful approach, and if some of your findings seem platelet-specific you may also explore megakaryocyte epigenetics data (as Chen et al. showed the enrichment of PLT/MPV signals in MEP lineage cells). I recognize the Kammers et al. paper may have emerged while the authors completed or submitted their work (though there are a few smaller earlier works on platelet cis-eQTL as well).

A: As acknowledged by the reviewer, Kammers *et al* paper (PMID: 33094331) was emerging at the time when our manuscript was about to be submitted. Platelet and megakaryocyte eQTL data reported in this paper have now been analyzed and significant eQTLs identified are now included in data presented in **Supplementary Table 15** and referred to in the manuscript text (lines 190-192, 550-551, 600, 606-607). The IPA analyses have been repeated with these data included, and their results are presented in the updated **Supplementary Tables 17-22**, with corrections in the text where applicable (lines 198-201, 211-213, 217-222, 629, 643-648).

While we agree that megakaryocytes and platelets are of primary importance in the eQTL analysis, we note that tissues other than platelets and megakaryocytes were defined by our DEPICT analysis as significantly enriched for our set of the 577 genome-wide significant PLT variants. Moreover, essential molecules, such as thrombopoietin, are mainly produced elsewhere, not in platelets. Therefore, it was reasonable and justifiable to look at GTeX, which includes data for *e.g.* liver and kidney, major production sites of thrombopoietin, and the Icelandic RNA sequencing dataset, which includes data for whole blood (*i.e.* cell types genetically related to platelets and enriched as per the DEPICT results) available for about 15,000 individuals with very precise genotyping information. This has been added to the text (lines 600-602), and the addition sounds as following: We analyzed all tissues, defined as significant by DEPICT, including non-hematopoietic ones, since they can also be relevant to control of PLT (*e.g.* liver and kidney, major production sites of thrombopoietin).

The study by Rodriguez *et al* (PMID: [32649856](#)) was just emerging when our manuscript was undergoing the final in-house review before the submission.

3) The authors briefly mention there are 4 novel signals in the study (annotated in TableS2). It may be worth describing those briefly (two intergenic, 1 intronic to CAMTA1, one coding variant in ABCA6).

A: After taking Vuckovic *et al* (PMID: 32888494) paper into consideration, the signals, which are located  $\geq 1$  MB from previously reported in GWAS and potentially representing novel PLT loci, are three (based on data from the GWAS catalog accessed on May 26, 2021). A paragraph describing potential genes in each of the regions has now been added to the Results section of the revised version (lines 85-108).

rs77542162 is a missense variant in ABCA6. We found that it is also associated with blood lipids, alkaline phosphatase, and height (**Supplementary Table 6**). There are no previously reported associations with platelet traits (PLT or MPV) in the 2MB window surrounding the SNP, whereas it has been associated with blood lipids (for instance, see van Leeuwen *et al* (PMID: 25751400) and Surakka *et al* (PMID: 25961943)), and some other variants in the area (about 0.5 MB from rs77542162) are associated with height. The variant is in the gene ABCA6 that belongs to the ATP-binding cassette transporter family, it is cholesterol-responsive and potentially involved in intracellular lipid transport processes (see Kaminski *et al* (PMID: 11478798) and Gai *et al* (PMID: 24028821)). While the exact mechanisms of ABCA6 involvement in control of these traits are yet to be uncovered, there is a known example of ABCG4, a related transporter that regulates cholesterol efflux and platelet production/number. For details, see Murphy *et al* (PMID: 23584088).

rs7808461 on chr7 and rs2118446 on chr2 have no previous reports of association with PLT either, although variants nearby have been reported in association with MPV, which is the only trait besides PLT that we detected associations with in our study. While rs2118446 is correlated with previously reported MPV variants rs2258404 and rs2577595 (Chen *et al* (PMID: 32888493) and Vuckovic *et al* (PMID: 32888494), respectively) with  $R^2 > 0.8$ , correlation of rs7808461 with the reported variants rs3218477, rs3218455, rs145530953 and rs3218502 (Astle *et al* (PMID: 27863252), Chen *et al* (PMID: 32888493) and Vuckovic *et al* (PMID: 32888494)) is  $R^2 < 0.2$ . In addition, it should be noted that while PLT and MPV are genetically related, association with one trait does not automatically mean association with the other one. For example, of 577 variants associated with PLT in our study only 33% (191 variants) associate also with MPV.

For rs7808461 on chr7, we did not observe significant cis-eQTLs in the tissues that were tested, nor in other tissues in GTEx. The variant is, however, located near (about 75 Kb) *ACTR3B*, which encodes a member of the actin-related proteins and may have a regulatory role in the actin cytoskeleton and induce cell-shape change and motility. The gene is expressed in platelets and megakaryocytes (expression data for platelets and megakaryocytes from Kammers *et al* (PMID: 33094331) and expression data for platelets from Londin *et al* (PMID: 24524654), although its precise role in platelets and megakaryocytes is yet to be determined. Another gene in proximity is *XRCC2* (less than 10 kb away), a member of the *RAD51* gene family, which is involved in homologous recombination repair of DNA damage. It does not seem to be expressed in platelets and megakaryocytes according to data from Kammers *et al* and Londin *et al*, making it less convincing as a candidate gene, since the variant's associations, which we detected, are platelet-specific (PLT and MPV).

Similar to rs7808461, rs2118446 associated only with platelet traits in our data. For rs2118446, we found one cis-eQTL that involves gene expression of *GCC2* in the adipose tissue (**Supplementary Table 15**). *GCC2* (GRIP and coiled-coil domain containing 2) is a peripheral membrane protein localized to the trans-Golgi network and is required for endosome-to-Golgi transport and maintenance of Golgi structure (Luke *et al*

(PMID: 12446665) and Derby *et al* (PMID: 17488291). According to expression data from Kammers *et al* and Londin *et al*, the gene is also expressed in platelets and megakaryocytes, although no significant cis eQTLs involving rs2118446 and *GCC2* were detected in these two cell types. The exact role of the gene in platelets and/or megakaryocytes is not known.

On a quick check of Chen *et al*. sentinel variants (accounting for different genome builds), 3 of these signals had a GWAS significant MPV signal relatively nearby to the current PLT signals. Thus, these may reflect similar signals as noted by others and the authors here due to the PLT/MPV consistent relationship at most loci. The 4th locus an *ABCA6* coding variant had nearby associations (3kb) with red cell traits in Chen *et al*. but interestingly not PLT/MPV.

While there is a consistent relationship between PLT and MPV, as noted by the reviewer, association of a SNP with one trait does not automatically translate into association with the other trait. Of the 577 variants associated with PLT in our study, only one third (191) also associate with MPV. Secondly, it should be pointed out that variants, located near our PLT variant rs7808461 and reported to associate with MPV (PMID: 27863252, 32888493, 32888494), correlate with rs7808461 with  $R^2 < 0.2$ , thus very likely representing a different signal.

As for the *ABCA6* missense variant, rs77542162, we replicated its previously reported association with total cholesterol (PMID: 25961943, 29507422, 30275531) and report a novel association with PLT ( $\text{Effect}_{\text{comb}} = -2.96 \times 10^3/\mu\text{l}$ ,  $P_{\text{comb}} = 8.7 \times 10^{-11}$ , where  $\text{Effect}_{\text{Ice}} = -2.93 \times 10^3/\mu\text{l}$ ,  $P_{\text{Ice}} = 7.7 \times 10^{-3}$  and  $\text{Effect}_{\text{UK}} = -2.97 \times 10^3/\mu\text{l}$ ,  $P_{\text{UK}} = 3.3 \times 10^{-9}$  with  $P_{\text{het}} = 0.98$ ). No association with MPV was observed for this variant in our study. For an example of an ABC transporter involved both in efflux of cholesterol and regulation of platelet production, see Murphy *et al* (PMID: 23584088).

These points have now been added to the revised version of the manuscript (lines 90-91, 96-101, 234-237).

4) There is not much discussion of the MPN association. It is interesting to note the TERT SNP association here. However, other genes traditionally affecting PLT like JAK2 and MPL are also known to be associated with MPN in clinical cases. I believe there may be more to discuss and unpack here. Were there rare/functional variants in JAK2 and MPL in the dataset and were they not associated with MPN?

A: MPN association was not discussed *per se*, but it is definitely noteworthy. It could be considered a positive control/proof of principle for the PLT PRS, since in our study we used the total cohort of myeloproliferative neoplasms. The cohort was used without further splitting into essential thrombocythemia, polycythemia vera and primary myelofibrosis due to very small sizes of cohorts representing each of these diseases. It could therefore be speculated that the PLT PRS association with MPNs is expected and is potentially driven by the essential thrombocythemia subset of the MPN cohort (which could not be addressed due to the cohort sizes).

Our dataset includes variants with minor allele frequencies (MAF) down to 0.05%. There is a missense variant in *MPL*, rs12731981, with MAF 1.63% in Iceland and 3.21% in the UK. There is also a rare intronic variant in *JAK2* rs12004239 with MAF 0.8% in Iceland and 0.92% in the UK. However, neither seems to have an effect on PLT that would likely have pathologic consequences. On par with this prediction, we did not observe association of either variant with MPN given the set p-value threshold.

All variants associated with PLT in both populations, those of them correlated with coding variants, their minor allele frequencies and all significant associations with MPN are presented in **Supplementary Tables 2, 7 and 9**.

5) Hematologic disorders mentioned here seem to involve blood cancers (white cell cancers would not necessarily be expected). What is the scope of disorders examined? (perhaps a list of codes?) Were bleeding and platelet disorders included? What about venous/arterial/cerebro vascular CVD? There is a long-running hypothesis about MPV increase being associated with increased CVD risk (and to some extent high PLT being associated with CVD) though the evidence is mixed. Astle et al. found CVD MR association in the opposite direction to that expected. It is unclear to me if these other disease etiologies would have been addressed in the current analysis. If so, the lack of positive findings may be worth some discussion.

A: As mentioned in **Methods** and in the main text, in the polygenic risk score part of the study, we tested 5,000 traits representing the majority of common human diseases (coronary artery disease, type 2 diabetes, various cancers etc) as well as various quantitative traits.

Hematologic diseases other than those listed in **Supplementary Table 4** were not analyzed for several reasons. First of all, some of cohorts were too small. Secondly, some other cohorts were defined using different criteria in the two populations and as a result were not comparable. For yet another cases, such as thrombocytopenia, there was no information on whether diagnosis was primary or secondary thrombocytopenia or either one. We performed analysis of only those hematologic diseases where cohorts were defined in the same way, that is, data coming from the Cancer Registry of Iceland and the UK and diagnosis confirmed by pathologists. These points have now been added to the **Methods** section.

We had data for thousands of phenotypes. For example, there were more than 3,300 quantitative traits from the UK (presenting various lab measurements, various data for brain and its specific areas, ECG, measurements of body size and its different parts, metabolic rates speech reception, birth weight and so on), more than 3,400 presenting various ICD codes, 39 lists from Cancer Registry, as well as data based on CISR and NCISR codes. 5,000 traits were considered to have a matching phenotype in the other cohort, therefore the threshold was set at  $1E-05$  ( $0.05/5,000$ ). The great majority of the phenotypes was not significantly associated with the PLT PRS. Only significant results are presented in the manuscript, as presenting the rest would be quite laborious. In the revised version, we included a clarification paragraph in the Methods section, in the part where we describe the **Polygenic risk score and phenotype correlation analyses** (lines 512-522).

Of note, several diseases reached meta p-values of association with the PLT PRS that was just above the set threshold. Since these results are considered not significant given the set threshold, they were not included. These diseases are presented in the table below, among which there are coronary artery disease and pure hypercholesterolemia:

#### Diseases with meta p-values close to the threshold

| Disease                 | Iceland (cases/controls) | UK (cases/controls) | Effect <sub>meta</sub> | CI             | P <sub>meta</sub> | P <sub>het</sub> |
|-------------------------|--------------------------|---------------------|------------------------|----------------|-------------------|------------------|
| Coronary artery disease | 19,129/125,489           | 28,110/380,455      | 0.024                  | (0.014, 0.035) | <b>1.1E-05</b>    | 0.58             |
| ICD10 N39               | 10,184/132,482           | 19,252/389,401      | 0.019                  | (0.010, 0.029) | <b>9.0E-05</b>    | 0.55             |
| ICD10 E780              | 1,203/140,923            | 33,184/375,469      | 0.021                  | (0.011, 0.031) | <b>5.5E-05</b>    | 0.21             |

Intracerebral hemorrhage with about 1,000 cases in each cohort was non-significant ( $p > 0.05$ ). The same was also true for venous thromboembolism represented by 2,650 cases in Iceland and 6,956 cases in the UK.

As acknowledged by the reviewer, there is mixed evidence with regards to MPV or PLT increase associating with increased CVD risk. According to this, both increase in MPV and increase in PLT are associated with increased risk of CVD, although in general PLT and MPV are inversely related. In other words, if increase in MPV is correlated with increased risk of CVD, PLT should be decreased. However, it could be speculated that this association with CVD might be based on a subset of those few variants that associate with PLT and MPV with the same direction of effect (17 identified in our study, marked with § in **Supplementary Table 6**).

Associations with CVD observed in our study were just above the significance threshold at the best, as mentioned above. Potentially, they could be strengthened if the polygenic risk scores were calculated using a subset of variants, such as those associating with PLT and MPV with the same direction of effect. This is, however, outside of the scope of our study, as we aimed at analyzing associations of the PLT PRS constructed with data representing the whole genome, not just specific regions or functional subsets.

Of note, although our findings for coronary artery disease (CAD) did not reach the set significant threshold, they are consistent with the results presented by Astle et al (PMID: 27863252) who reported a weak inverse association between risk of CAD and MPV. The inverse relationship between risk of CAD and MPV would imply that risk of CAD is in turn positively correlated with PLT, which is in agreement with the observation in our study.

This point has now been added to the Discussion section of the revised version (lines 289-297) and sounds as following: At the same time, genetic sharing by PLT and cardiovascular diseases, such as coronary artery disease (CAD), venous thromboembolism, and intracerebral hemorrhage did not reach the applied significance threshold of  $1 \times 10^{-5}$ , although each of these cohorts included from about 1,000 to 28,110 cases. Of note, although our findings for coronary artery disease (CAD) did not reach the set significance threshold ( $P_{\text{meta}} = 1.1 \times 10^{-5}$ ,  $\text{Effect}_{\text{meta}} = 0.024$ ), they are consistent with the results presented by Astle *et al* [12] who reported a weak inverse correlation between risk of CAD and MPV, opposite to what is expected (see e.g. [58]). This inverse relationship between risk of CAD and MPV implies that risk of CAD is positively correlated with PLT, which is in agreement with the observations in our study.

6) The association of PLT with MPV is expected as the authors acknowledge. This is long known as the authors cite to several older papers. It is also illuminated by more recent genetic correlation analyses (i.e., Eicher et al. and Chen et al.). It is unclear how/if red cell correlations were examined. It is mentioned in the Discussion as nothing found but then why are red cell traits not listed in Table S3? Two papers are cited as recent – however, the most up to date and critical is Chen et al. 2020 – see their genetic correlation matrices (their Figure S6B) between blood cell traits where they show stronger PLT to WBC correlation and weak PLT to RBC traits.

A: We tested counts of all blood cell types available, including red blood cells (RBC). Results of the PLT PRS association with RBC as well as the cohort size, representing RBC, are presented in the bottom line of **Table 1** in the manuscript. With regards to **Supplementary Table 3**, there are listed only cohorts representing PLT and the ones that are significantly correlated with the platelet count polygenic risk score (see the table legend). As mentioned above and in the manuscript, 5,000 phenotypes, including major human diseases and traits, were included in the analysis. Only the ones associated with the PLT PRS with  $p < 1E-05$



(0,05 corrected with the 5,000 phenotypes) underwent further analyses for which data are presented. A clarification has been added (lines 381-382) and sounds as following: See **Supplementary Table 3** for details on cohorts that represent traits associated with the PLT polygenic risk score.

With regards to correlation matrices, stronger correlation of PLT with WBC and weaker between PLT and RBC has been reported before, in the Japanese population in 2018 (PMID: 29403010) and in Europeans in 2019 (PMID: 30858613). Therefore since the study by Chen *et al*, which was just emerging at the time of our submission, is not the first report of this discovery and does not substantially change or challenge these results, their paper was not cited in the original submission but has now been added to the revised version.

7) Table S4 – Inherited platelet disorders – what is your reference? (ISTH Tier 1 Platelet/bleeding genes/UK PanelApp as rather current) To my knowledge SH2B3 does not belong in inherited platelet disorders. CD36 arguably does not as well since most reported mutations are mild with no effect on bleeding diatheses or hemostasis.

A: For the diseases, the source was the Online Mendelian Inheritance in Man database ([www.omim.org](http://www.omim.org)) in addition to literature search. While it is correct that variants in *SH2B3* do not cause inherited platelet disorders *per se*, a somatic mutation in this gene was found in a patient with essential thrombocythemia (PMID: 20404132) and a germ-line mutation was discovered in a patient with MDS/MPN-ring sideroblasts thrombocytosis (PMID: 31173385). With respect to this notion, the column is now called “Platelet-related disorder”. As for CD36, although the mutations may have mild effects, carriers are reportedly presented with macrothrombocytopenia, that is platelet count and platelet size are affected (PMID: 2316511).

Information on the source was added to the revised version of the manuscript (in the text (lines 154-157) and in the legends of **Supplementary Tables 2, 8, 9** and **16**). The revised text (lines 154-157) sounds as following: Only 38 out of the 577 variants are located in or near genes implicated in platelet disorders (**Supplementary Tables 2** and **8**), with platelet disorders defined based on information from the Online Mendelian Inheritance in Man database (OMIM, [www.omim.org](http://www.omim.org)) and confirmed through literature search. See also our response to Comment 1 by Reviewer 1.

8) Table S7 for platelet biology and platelet disorders seems somewhat incomplete. What is the source? (as above some sources suggested). Further, for platelet function/aggregation you may require an updated search. For instance the very same GRK5 SNP mentioned above associated here with PLT is not given which has evidence of strength similar to PEAR1.

A: Please refer to our response to Comment 8 by Reviewer 1.

9) Caution is needed in interpreting the PLT PRS as potentially suggesting causal links. Given the numerous loci involved and their complex biology these PRS associations may be driven by non-causal relationships as well as chance and other factors. In particular I find the Hypertension relationship to be one I am skeptical of given the modest effect size and modest association in Icelanders ( $p=0.017$ ). The OR are rather weak in Table S6 by contrast with those of RA/MPN.

A: We absolutely agree with your point regarding causality, and we are not claiming causality either. Our main point is that there is shared genetic basis between PLT and these phenotypes, with no speculations on what is the cause and what is the consequence. While we admit that association with hypertension is modest in Iceland, it should still be considered a significant result, since it replicates the significant association observed in the UK. Weaker ORs may indicate that genetic sharing between PLT and hypertension is less substantial than, for instance, sharing between PLT and MPN.

#### Minor comments

1) A lot of the later analyses are exploratory data analyses (enrichment, IPA, master regulators). While these can be illuminating there is also some circularity in these types of analyses (i.e., biases of existing databases/literature), and the fact that gene expression levels in specific cell types may drive many of these enrichments, they may be non-specific and categories with a high degree of overlap may not provide granular detail or insights. E.g., the enrichment of spleen associations is not surprising given that the spleen is the primary site of platelet destruction and any spleen or platelet expression dataset will nearly always show a high degree of overlap. At the end of the day I find myself somewhat lost in very large tables of gene lists and there is not a lot of surety about what is truly meaningful (without further experimentation or support). However, as mentioned above and below a few areas may be more interesting (steatosis, cancer, MPN) while others may not be (HTN).

A: It is a fair comment on some circularity in the analyses. However, there is also complementarity that should be acknowledged: DEPICT deals with GWAS data relating them to tissue and gene set enrichment, whereas the core in the IPA analysis are eQTL data that are explored in the context of how differential expression of genes in the dataset could potentially be linked to certain outcomes/functions/pathways.

While enrichment of spleen is not surprising, it can be viewed as a positive control/ proof of principle: it would be surprising if data from GWAS of PLT did not show enrichment with regards to this organ essential to platelet biology.

It is also a fair comment that studies of this type generate a huge amount of data, long gene lists and so on, and often their meaning might be debatable or not obvious. However, such studies can also be viewed as generation of knowledge/information that can be considered for further functional analyses by researchers who work with *in vitro* and/or *in vivo* experimental models. Alternatively, researchers, who work with *in vivo* and/or *in vitro* experimental models, find in these results some support for their observations that comes from studies of human subjects. Throughout the text we do emphasize that further experimental analysis is required to elucidate and/or confirm functions and potential mechanisms.

With regards to areas of special interest, please refer to our responses to Major Comment 4 and Minor Comment 4.

2) Table S5 the note that this is with respect to PLT increasing allele is somewhat buried. The table might be easier to interpret if you also included in the Effects of the PLT trait as well (reinforces the increasing aspect and also allows side by side comparison of effect sizes).

A: A column with the PLT effects has been added to the table (new Supplementary Table 6), as well as a clarification to the table legend that sounds as following: Effects are expressed

in standard deviations and presented with respect to the PLT increasing allele for which the effect is presented in STD (PLT Emeta (in STD) column).

3) In regards to Hepatic Steatosis is interesting to note that some of the predictive models that have been built in the literature include PLT as a covariate. It would be worthwhile to cite these. Likewise, you cannot wholly claim that is a novel link to this paper.

A: It should be noted that in the original version of the manuscript, we did not claim a novel link to hepatic steatosis. Moreover, after adding eQTLs from the platelet and megakaryocyte datasets (Kammers *et al* (PMID: 33094331)) and rerunning the IPA analyses, the Benjamini-Hochberg corrected p-value for hepatic steatosis became 0.062, that is above the set significant threshold of Benjamini-Hochberg corrected p-value  $\leq 0.05$ .

However, we point out in the original and revised versions of the manuscript that our study demonstrates an association of the PLT PRS with liver enzymes alkaline phosphatase and gamma-glutamyl transpeptidase, not found in previous studies, which had applied a polygenic risk score (cited in the manuscript), and therefore it is one of the first to provide evidence for genetic links between PLT and these liver enzymes.

4) In re: to cancer and platelets beyond MPN, it may be worthwhile to read some of the works of Thomas Wurdinger on platelet transcriptomes as biomarkers for cancer types and consider citing some of that work

A: We did not observe association with cancers (other than MPNs) in the PLT PRS part of the study, and our thoughts on association with MPN are presented in our response to Major Point 4. Notably, we were not looking at platelet transcriptome *per se*, but rather at gene expression from the PLT-associated loci in various tissues, defined as significantly enriched by DEPICT analyses, where only 26 of 235 eQTL genes were found to be restricted to platelets and/or megakaryocytes. Therefore, the purpose of the suggested literature review in the context of our manuscript is not very clear.

5) There are some attempts being made to capture published Polygenic Risk Scores to make them more transparent and reproducible due to known issues transferring these PRS across populations and ongoing research in that area. I suggest the authors consider if accepted depositing their PRS in such a resource (or making a clear Supplemental table of the PRS included and PRS calculations)

A: The PRS will be deposited if the manuscript is accepted.



Reviewer #3 (Remarks to the Author):

Review: Platelet count: Sequence variants, its genetic associations with other traits and potential regulatory mechanisms

This manuscript by Mikaelsdottir et al. presents the results of a large-scale meta-analysis of platelet count including summary data from GWAS of more than half a million European people. After identifying a large number of independent variants (4 are claimed as novel), the authors characterized potential mechanisms of action via coding variant and cis- expression quantitative trait locus (cis-eQTL) analyses and Data- driven Expression Prioritized Integration for Complex Traits (DEPICT). In addition they employed the Ingenuity Pathway Analysis (IPA) to look for enrichment of effects by pathway. Finally, they compared the predictive value of a polygenic risk score for platelet count among an array of additional available phenotypes. Overall, this paper represents a well-powered analysis coupled with hypothesis-generating downstream functional analyses that are likely to be of interest to the field.

Major comments:

1. This article needs a “table 1” summarizing the demographic information and platelet related measurements in each dataset for all included individuals.

A: These data are presented in **Supplementary Table 3**.

2. The authors do not mention inclusion and exclusion criteria of subjects. Platelet counts could be greatly affected by variety of disease conditions and medications.

A: Please refer to our response to Comment 1 by Reviewer 1.

3. The effect of relatedness in the association tests from the genotypically imputed 1st and 2nd degree Icelanders should be explored more- it would be helpful to have one more column in supplemental table 2 to list the p-value from genotyped-Icelander-only, as a sensitivity analysis.

A: We have calculated the effect estimate and p-values for the Icelandic analysis restricted to genotyped individuals (Iceland Genotyped only). The comparison with results, which include both genotyped and familiarly imputed Icelanders (Iceland all), are presented in **the table below and can be seen in the plot** of effects for the 577 PLT variants following the table. We do not observe any bias in the effect estimates, weighted linear regression between the effect estimates with and without the ungenotyped individualst included gives a slope of 1.01. The changes in the p-values are not big either, on average the Z-score statistic only increases by 3% by including the ungenotyped individuals, probably because they are close relatives of genotyped individuals that have PLT measurements. If considered necessary by the Reviewer, the plot and/or the table can be added as a supplementary material.

PLT association results for all Icelanders vs. only genotyped. Effects are expressed in  $N \times 10^3/\mu\text{l}$ .

| rsName                                                           | Chr  | Pos       | EA/OA     | Iceland All |         | Iceland Genotyped only |         |
|------------------------------------------------------------------|------|-----------|-----------|-------------|---------|------------------------|---------|
|                                                                  |      |           |           | Effect      | Pval    | Effect                 | Pval    |
| rs263527                                                         | chr1 | 2241549   | C/T       | -2.07       | 2.3E-09 | -2.09                  | 8.5E-09 |
| rs1417986                                                        | chr1 | 7737674   | T/A       | -1.61       | 5.5E-06 | -1.55                  | 3.1E-05 |
| rs10864368                                                       | chr1 | 8858254   | C/T       | 1.13        | 0.001   | 1.19                   | 0.001   |
| rs11121529                                                       | chr1 | 10211630  | G/C       | -1.98       | 2.5E-04 | -2.12                  | 1.8E-04 |
| rs2236055                                                        | chr1 | 11982204  | G/A       | -2.29       | 3.2E-11 | -2.23                  | 6.4E-10 |
| rs66530629                                                       | chr1 | 24705677  | A/G       | -1.10       | 0.007   | -1.03                  | 0.015   |
| rs9438901                                                        | chr1 | 25258485  | G/A       | 0.97        | 0.046   | 0.96                   | 0.058   |
| rs909832                                                         | chr1 | 25427534  | G/C       | -2.45       | 3.7E-12 | -2.51                  | 9.7E-12 |
| rs56214942                                                       | chr1 | 25565468  | A/G       | 1.32        | 1.4E-04 | 1.28                   | 4.2E-04 |
| rs182050989                                                      | chr1 | 26936054  | T/C       | 2.81        | 0.011   | 3.31                   | 0.004   |
| rs2236074                                                        | chr1 | 27884873  | A/G       | -1.19       | 9.8E-04 | -1.27                  | 7.6E-04 |
| rs157198                                                         | chr1 | 28877395  | C/T       | -1.20       | 0.025   | -1.32                  | 0.019   |
| rs34101571                                                       | chr1 | 30739047  | A/G       | 5.17        | 0.002   | 5.97                   | 5.6E-04 |
| rs35343437                                                       | chr1 | 36307804  | T/G       | 1.04        | 0.003   | 0.95                   | 0.009   |
| rs7529794                                                        | chr1 | 39937698  | T/G       | 1.88        | 8.6E-07 | 1.70                   | 2.2E-05 |
| rs12731981                                                       | chr1 | 43338669  | A/G       | 3.75        | 0.006   | 4.68                   | 0.001   |
| rs75139539                                                       | chr1 | 43375311  | T/C       | 2.99        | 0.002   | 3.69                   | 2.6E-04 |
| rs17853159                                                       | chr1 | 45345193  | A/G       | 1.79        | 0.006   | 1.72                   | 0.011   |
| rs11211124                                                       | chr1 | 45496737  | C/T       | -3.00       | 5.2E-12 | -3.08                  | 1.3E-11 |
| rs10789481                                                       | chr1 | 45917911  | G/C       | 1.52        | 9.3E-06 | 1.51                   | 2.8E-05 |
| rs140436199                                                      | chr1 | 87636754  | A/G       | -2.42       | 6.9E-05 | -2.41                  | 1.6E-04 |
| rs79898419                                                       | chr1 | 91122004  | G/A       | 1.12        | 0.009   | 0.86                   | 0.056   |
| rs17501512                                                       | chr1 | 91546924  | G/C       | -0.92       | 0.008   | -1.01                  | 0.005   |
| rs945631                                                         | chr1 | 92960610  | A/G       | -2.60       | 1.6E-04 | -2.22                  | 0.002   |
| rs547866                                                         | chr1 | 93259496  | T/C       | -0.95       | 0.007   | -1.02                  | 0.006   |
| rs4477285                                                        | chr1 | 94411372  | G/A       | -1.36       | 8.0E-05 | -1.49                  | 3.5E-05 |
| rs333947                                                         | chr1 | 109928142 | A/G       | 1.15        | 0.018   | 1.58                   | 0.002   |
| rs2999157                                                        | chr1 | 112690571 | G/A       | 1.83        | 1.1E-07 | 2.04                   | 1.7E-08 |
| rs3767812                                                        | chr1 | 117612998 | A/G       | 2.09        | 3.4E-06 | 2.15                   | 5.2E-06 |
| rs61819435                                                       | chr1 | 150539152 | G/C       | 2.06        | 1.4E-08 | 2.45                   | 1.3E-10 |
| rs4521985                                                        | chr1 | 154151047 | A/G       | 1.58        | 1.4E-05 | 1.72                   | 6.3E-06 |
| rs78261031                                                       | chr1 | 156142679 | A/G       | -2.02       | 0.016   | -1.88                  | 0.033   |
| rs1342442                                                        | chr1 | 156496907 | G/A       | 1.88        | 1.3E-07 | 1.91                   | 3.2E-07 |
| rs12041331                                                       | chr1 | 156899922 | A/G       | 2.35        | 8.7E-04 | 2.15                   | 0.004   |
| rs6425522                                                        | chr1 | 171976942 | T/C       | 3.26        | 1.7E-16 | 3.23                   | 5.9E-15 |
| rs10174                                                          | chr1 | 185297982 | G/A       | -0.76       | 0.031   | -0.82                  | 0.026   |
| rs1124025                                                        | chr1 | 199010689 | C/G       | -1.69       | 2.6E-05 | -1.88                  | 8.8E-06 |
| rs5780225, rs751257259,<br>rs763749135, rs796130745<br>rs2802813 | chr1 | 204292903 | CTGTTAG/C | -1.21       | 0.001   | -1.22                  | 0.002   |
|                                                                  | chr1 | 204936906 | C/T       | 0.90        | 0.046   | 0.93                   | 0.048   |
| rs1172155                                                        | chr1 | 205251113 | T/C       | -1.92       | 9.7E-04 | -2.12                  | 5.1E-04 |
| rs1668871                                                        | chr1 | 205268009 | C/T       | 1.93        | 7.0E-08 | 1.93                   | 2.5E-07 |
| rs1891058                                                        | chr1 | 213764039 | G/A       | 0.97        | 0.007   | 0.97                   | 0.010   |
| rs6696074                                                        | chr1 | 225774988 | C/T       | -1.56       | 6.4E-06 | -1.55                  | 1.9E-05 |
| rs138994074, rs76006554                                          | chr1 | 226351602 | CA/C      | -1.60       | 5.4E-04 | -1.98                  | 4.8E-05 |
| rs4846914                                                        | chr1 | 230159944 | G/A       | -0.78       | 0.027   | -0.85                  | 0.022   |
| rs2758994                                                        | chr1 | 236540467 | I/T       | 1.16        | 0.003   | 1.34                   | 0.001   |
| rs12239046                                                       | chr1 | 247438293 | T/C       | -0.77       | 0.030   | -0.73                  | 0.049   |
| rs41315846                                                       | chr1 | 247549001 | C/T       | 3.68        | 6.4E-26 | 3.79                   | 5.5E-25 |
| rs56043070                                                       | chr1 | 247556467 | A/G       | -7.54       | 1.5E-27 | -7.83                  | 4.4E-27 |

|                         |      |           |      |       |         |       |         |
|-------------------------|------|-----------|------|-------|---------|-------|---------|
| rs1339847               | chr1 | 247875992 | A/G  | 2.32  | 4.0E-05 | 2.28  | 1.2E-04 |
| rs3811444               | chr1 | 247876149 | T/C  | -2.70 | 1.4E-13 | -2.90 | 3.3E-14 |
| rs35330522              | chr2 | 12736934  | A/G  | 0.88  | 0.011   | 1.03  | 0.004   |
| rs72781667              | chr2 | 24002797  | G/A  | -1.25 | 0.012   | -1.38 | 0.008   |
| rs1260326               | chr2 | 27508073  | T/C  | 2.43  | 2.6E-11 | 2.57  | 1.4E-11 |
| rs655029                | chr2 | 31254972  | G/A  | -3.67 | 9.3E-22 | -3.73 | 9.8E-21 |
| rs6544047               | chr2 | 36921087  | A/T  | 1.19  | 6.8E-04 | 1.20  | 0.001   |
| rs7563723               | chr2 | 37819920  | C/T  | -1.35 | 2.4E-04 | -1.49 | 1.0E-04 |
| rs10181075              | chr2 | 42915859  | G/T  | -0.72 | 0.044   | -0.82 | 0.027   |
| rs1430083               | chr2 | 43221340  | T/A  | 1.49  | 0.003   | 1.42  | 0.007   |
| rs149290349             | chr2 | 43224818  | A/G  | -4.14 | 1.2E-07 | -3.95 | 1.4E-06 |
| rs4952782               | chr2 | 45846957  | T/A  | -0.96 | 0.011   | -1.03 | 0.009   |
| rs10168349              | chr2 | 46133768  | C/G  | 1.00  | 0.005   | 0.96  | 0.010   |
| rs6545465               | chr2 | 54985201  | T/C  | 1.33  | 0.004   | 1.52  | 0.002   |
| rs58966835              | chr2 | 66423642  | C/T  | -4.45 | 0.029   | -4.26 | 0.047   |
| rs939136                | chr2 | 66450399  | G/C  | -1.33 | 3.7E-04 | -1.52 | 9.7E-05 |
| rs10048745              | chr2 | 68735005  | A/G  | 2.12  | 2.3E-07 | 2.18  | 3.4E-07 |
| rs3771529               | chr2 | 69937708  | A/G  | -2.96 | 2.6E-12 | -2.85 | 1.2E-10 |
| rs2301984               | chr2 | 74493928  | G/A  | 1.26  | 0.012   | 1.50  | 0.004   |
| rs11682055              | chr2 | 85411200  | G/A  | -0.79 | 0.023   | -0.79 | 0.030   |
| rs147348486             | chr2 | 85539177  | A/G  | 2.95  | 0.050   | 3.21  | 0.042   |
| rs2118446               | chr2 | 108529352 | T/C  | 1.74  | 9.5E-07 | 1.87  | 5.5E-07 |
| rs76496105              | chr2 | 109690090 | G/C  | -1.98 | 0.002   | -2.34 | 5.2E-04 |
| rs7562480               | chr2 | 111177655 | C/T  | 0.76  | 0.027   | 0.72  | 0.045   |
| rs1045267               | chr2 | 111429464 | A/G  | 2.31  | 5.6E-09 | 2.38  | 9.5E-09 |
| rs6734238               | chr2 | 113083453 | G/A  | 1.74  | 4.4E-07 | 2.00  | 3.1E-08 |
| rs4849842               | chr2 | 120255090 | T/A  | 1.73  | 4.7E-06 | 1.62  | 4.1E-05 |
| rs145365565             | chr2 | 159503699 | A/C  | -2.67 | 1.2E-07 | -2.54 | 1.4E-06 |
| rs76774368              | chr2 | 159748003 | T/C  | 5.61  | 1.1E-05 | 5.93  | 8.4E-06 |
| rs12052715              | chr2 | 159820864 | C/G  | 2.87  | 1.1E-14 | 3.01  | 1.0E-14 |
| rs114821641             | chr2 | 159858447 | T/C  | 11.88 | 4.1E-06 | 10.55 | 8.9E-05 |
| rs7585866               | chr2 | 191831529 | G/A  | 0.81  | 0.028   | 0.91  | 0.018   |
| rs979020                | chr2 | 197305025 | C/T  | -1.07 | 0.002   | -1.08 | 0.003   |
| rs7560328               | chr2 | 201300114 | A/C  | -1.33 | 1.8E-04 | -1.30 | 4.6E-04 |
| rs72932729              | chr2 | 202785544 | C/T  | -1.09 | 0.001   | -1.00 | 0.005   |
| rs1047891               | chr2 | 210675783 | A/C  | -1.21 | 0.002   | -1.60 | 9.1E-05 |
| rs17572109              | chr2 | 218229211 | A/G  | 1.63  | 2.1E-05 | 1.65  | 3.9E-05 |
| rs115504855             | chr2 | 218229854 | G/A  | -2.00 | 0.040   | -2.24 | 0.029   |
| rs10207991              | chr2 | 224898426 | T/C  | -3.66 | 2.0E-08 | -3.46 | 4.3E-07 |
| rs116778355             | chr2 | 224951925 | T/A  | -3.35 | 0.012   | -2.95 | 0.036   |
| rs11676298              | chr2 | 226427015 | G/C  | 2.90  | 5.1E-12 | 2.89  | 5.5E-11 |
| rs55664157              | chr2 | 233366008 | A/T  | -2.36 | 2.7E-06 | -2.27 | 1.7E-05 |
| rs114266592             | chr2 | 234981357 | C/T  | -2.36 | 0.039   | -2.29 | 0.056   |
| rs78909033              | chr2 | 240571486 | A/G  | 2.30  | 1.5E-06 | 2.42  | 1.5E-06 |
| rs9810259               | chr3 | 12226691  | G/C  | -1.84 | 2.4E-07 | -1.86 | 6.8E-07 |
| rs7618405               | chr3 | 18209017  | A/C  | -2.74 | 4.5E-11 | -2.98 | 8.3E-12 |
| rs62240975              | chr3 | 18444681  | A/G  | -1.38 | 3.6E-04 | -1.35 | 8.8E-04 |
| rs1388786               | chr3 | 27330731  | G/A  | -2.20 | 3.4E-09 | -2.10 | 7.9E-08 |
| rs2371108               | chr3 | 27715527  | T/G  | 1.07  | 0.003   | 1.29  | 5.2E-04 |
| rs13084317              | chr3 | 39146367  | A/G  | 1.20  | 9.1E-04 | 1.34  | 4.3E-04 |
| rs397949584, rs57383920 | chr3 | 47207585  | TA/T | -1.53 | 7.1E-04 | -1.66 | 4.8E-04 |
| rs71617297              | chr3 | 56690065  | G/T  | 2.25  | 0.011   | 1.97  | 0.033   |
| rs2046823               | chr3 | 56744983  | A/G  | 1.56  | 6.4E-05 | 1.53  | 1.8E-04 |
| rs17288922              | chr3 | 56817359  | A/G  | -4.82 | 3.1E-27 | -5.00 | 1.0E-26 |

|                        |      |           |         |        |         |        |         |
|------------------------|------|-----------|---------|--------|---------|--------|---------|
| rs17288936             | chr3 | 56822572  | T/C     | -5.83  | 1.7E-25 | -5.77  | 6.0E-23 |
| rs75665326             | chr3 | 56831053  | A/T     | -3.07  | 8.2E-08 | -3.11  | 2.2E-07 |
| rs17825630             | chr3 | 56916027  | A/G     | 2.79   | 4.4E-09 | 2.85   | 1.1E-08 |
| rs6786088              | chr3 | 58329348  | C/T     | -1.84  | 3.9E-07 | -2.00  | 1.6E-07 |
| rs7611020              | chr3 | 69807676  | G/A     | 1.44   | 5.0E-05 | 1.49   | 6.1E-05 |
| rs9809116              | chr3 | 72348128  | G/A     | 1.52   | 1.8E-05 | 1.50   | 5.3E-05 |
| rs7610102              | chr3 | 101527959 | A/G     | -0.74  | 0.031   | -0.91  | 0.012   |
| rs167924               | chr3 | 107660990 | A/G     | -0.73  | 0.042   | -0.75  | 0.044   |
| rs1143671              | chr3 | 121928439 | T/C     | 0.87   | 0.012   | 0.74   | 0.042   |
| rs3804749              | chr3 | 123114156 | I/T     | 2.43   | 2.2E-11 | 2.70   | 1.5E-12 |
| rs17295246             | chr3 | 123386874 | A/G     | -1.48  | 2.8E-04 | -1.58  | 2.0E-04 |
| rs2165252              | chr3 | 124626515 | I/C     | 0.89   | 0.015   | 0.67   | 0.080   |
| rs73199529             | chr3 | 124837573 | T/G     | 3.85   | 0.004   | 3.53   | 0.011   |
| rs12629965             | chr3 | 128703815 | G/A     | -0.86  | 0.031   | -1.00  | 0.017   |
| rs557662044            | chr3 | 129419788 | C/T     | -28.47 | 2.2E-12 | -29.10 | 1.0E-11 |
| rs1347209              | chr3 | 136907855 | G/T     | -0.88  | 0.011   | -1.07  | 0.003   |
| rs900400               | chr3 | 157080986 | C/T     | 0.82   | 0.025   | 1.03   | 0.007   |
| rs77232317             | chr3 | 167747119 | A/G     | 0.78   | 0.044   | 0.91   | 0.026   |
| rs73167972             | chr3 | 169148751 | G/A     | 1.74   | 0.013   | 1.82   | 0.014   |
| rs9860749              | chr3 | 179013232 | G/A     | 2.09   | 7.0E-08 | 2.20   | 6.2E-08 |
| rs10937159             | chr3 | 184034513 | A/C     | 1.12   | 0.001   | 1.22   | 7.8E-04 |
| rs562344339            | chr3 | 184060596 | C/T     | -17.19 | 4.3E-07 | -16.58 | 2.6E-06 |
| rs952982               | chr3 | 184371784 | T/G     | 7.28   | 3.1E-10 | 7.83   | 1.0E-10 |
| rs78565404             | chr3 | 184372454 | T/C     | 10.13  | 1.0E-44 | 10.06  | 1.6E-40 |
| rs6141                 | chr3 | 184372478 | C/T     | -3.80  | 5.1E-28 | -3.88  | 8.4E-27 |
| rs572476245            | chr3 | 184373314 | G/T     | -18.42 | 6.5E-35 | -19.09 | 5.5E-34 |
| rs376419231,rs55827759 | chr3 | 184373595 | TGGAA/T | -3.68  | 2.6E-06 | -4.08  | 6.3E-07 |
| rs34623301             | chr3 | 184375252 | A/G     | 4.72   | 1.1E-28 | 4.80   | 3.7E-27 |
| rs147646497            | chr3 | 184387795 | A/G     | 6.53   | 3.6E-09 | 6.20   | 8.7E-08 |
| rs11705701             | chr3 | 185826521 | A/G     | -1.67  | 1.7E-06 | -1.62  | 1.0E-05 |
| rs9829114              | chr3 | 196791752 | A/G     | -1.15  | 0.001   | -1.35  | 2.7E-04 |
| rs35537543             | chr4 | 3218574   | G/A     | -10.95 | 5.1E-04 | -11.99 | 3.1E-04 |
| rs13108218             | chr4 | 3442204   | A/G     | 1.77   | 8.2E-07 | 1.57   | 3.0E-05 |
| rs11734099             | chr4 | 6889708   | A/G     | 2.20   | 5.7E-07 | 2.49   | 6.0E-08 |
| rs62291089             | chr4 | 6908608   | G/C     | -1.19  | 0.005   | -0.69  | 0.122   |
| rs6815294              | chr4 | 7040622   | G/A     | -1.45  | 2.8E-05 | -1.54  | 2.1E-05 |
| rs2315552              | chr4 | 17625671  | A/G     | 0.76   | 0.035   | 0.66   | 0.080   |
| rs138541467            | chr4 | 38652151  | TA/T    | -0.77  | 0.025   | -0.91  | 0.011   |
| rs58408429             | chr4 | 56903658  | C/T     | -1.91  | 1.4E-05 | -1.85  | 5.4E-05 |
| rs11735092             | chr4 | 87305079  | C/T     | 0.94   | 0.007   | 0.86   | 0.019   |
| rs6532796              | chr4 | 99121091  | A/G     | -1.01  | 0.008   | -1.01  | 0.011   |
| rs4699156              | chr4 | 105114278 | A/C     | -0.92  | 0.017   | -0.98  | 0.016   |
| rs113693454            | chr4 | 105286606 | A/T     | -2.41  | 0.042   | -2.47  | 0.045   |
| rs6533483              | chr4 | 109966833 | A/G     | -2.25  | 2.1E-10 | -2.19  | 3.0E-09 |
| rs58583086             | chr4 | 119635207 | A/G     | -1.53  | 1.7E-05 | -1.41  | 1.4E-04 |
| rs17755079             | chr4 | 123749526 | T/I     | -1.62  | 0.002   | -1.31  | 0.019   |
| rs60179902             | chr4 | 140915737 | C/A     | -1.34  | 9.4E-05 | -1.13  | 0.002   |
| rs1512281              | chr4 | 144513749 | G/A     | -1.57  | 5.6E-06 | -1.40  | 1.1E-04 |
| rs1429139              | chr4 | 147362952 | T/A     | 2.04   | 6.0E-07 | 1.90   | 8.5E-06 |
| rs28666858             | chr4 | 151495230 | T/C     | -1.63  | 2.5E-06 | -1.51  | 3.2E-05 |
| rs112969588            | chr4 | 156770941 | C/T     | -1.53  | 0.008   | -1.40  | 0.021   |
| rs7705526              | chr5 | 1285859   | A/C     | 2.72   | 7.4E-14 | 2.96   | 7.5E-15 |
| rs2853677              | chr5 | 1287079   | G/A     | 2.03   | 7.5E-09 | 2.22   | 1.6E-09 |
| rs35179196             | chr5 | 62235390  | A/AT    | 0.95   | 0.007   | 0.96   | 0.009   |

|                        |      |           |          |       |         |       |         |
|------------------------|------|-----------|----------|-------|---------|-------|---------|
| rs10940080             | chr5 | 66704896  | G/A      | 1.24  | 4.4E-04 | 1.34  | 2.8E-04 |
| rs4976137              | chr5 | 67925107  | A/G      | 1.10  | 0.002   | 1.04  | 0.006   |
| rs34651                | chr5 | 72848178  | C/T      | -1.33 | 0.041   | -1.11 | 0.104   |
| rs2307111              | chr5 | 75707853  | C/T      | 0.80  | 0.025   | 0.91  | 0.016   |
| rs7706078              | chr5 | 76444374  | T/C      | -0.96 | 0.006   | -0.96 | 0.008   |
| rs34968964             | chr5 | 76665143  | C/G      | -5.81 | 0.023   | -6.53 | 0.016   |
| rs34592828             | chr5 | 76701084  | A/G      | -7.47 | 7.6E-15 | -7.03 | 2.4E-12 |
| rs353937               | chr5 | 77812245  | A/T      | -1.16 | 7.9E-04 | -1.12 | 0.002   |
| rs56363865             | chr5 | 78489919  | C/T      | -2.62 | 1.8E-11 | -2.46 | 1.5E-09 |
| rs565934142            | chr5 | 88776849  | A/G      | 13.36 | 0.004   | 12.20 | 0.011   |
| rs114694170            | chr5 | 88884379  | C/T      | 8.72  | 6.1E-45 | 8.92  | 4.7E-43 |
| rs1158464              | chr5 | 89042972  | A/G      | 1.95  | 1.1E-06 | 2.16  | 2.7E-07 |
| rs10074585             | chr5 | 90959181  | G/T      | 1.27  | 0.002   | 1.05  | 0.013   |
| rs57486725             | chr5 | 111725319 | G/T      | -3.41 | 1.2E-06 | -3.49 | 2.0E-06 |
| rs1047440              | chr5 | 123346140 | T/C      | 1.06  | 0.002   | 0.97  | 0.008   |
| rs11950562             | chr5 | 132316836 | C/A      | -2.00 | 7.0E-09 | -2.02 | 2.5E-08 |
| rs2070722              | chr5 | 132488794 | C/A      | 2.00  | 3.3E-08 | 2.04  | 7.7E-08 |
| rs329117               | chr5 | 134524410 | T/C      | -0.74 | 0.036   | -0.74 | 0.047   |
| rs589153               | chr5 | 139677963 | G/A      | -1.07 | 0.004   | -0.95 | 0.015   |
| rs449454               | chr5 | 142153497 | A/G      | -2.22 | 3.3E-10 | -2.57 | 3.8E-12 |
| rs4704727              | chr5 | 156953056 | T/G      | 0.89  | 0.016   | 1.11  | 0.004   |
| rs6863275              | chr5 | 158769734 | C/A      | -1.94 | 0.002   | -2.10 | 0.002   |
| rs6556405              | chr5 | 159208094 | C/T      | -1.40 | 6.6E-04 | -1.42 | 9.4E-04 |
| rs4538653              | chr5 | 160168887 | G/C      | 1.86  | 1.1E-06 | 2.11  | 1.3E-07 |
| rs6861931              | chr5 | 160208949 | T/C      | -1.63 | 0.004   | -1.70 | 0.004   |
| rs10587485,rs58403685  | chr5 | 177310990 | C/CAG    | 3.30  | 6.4E-04 | 2.75  | 0.006   |
| rs11960863             | chr5 | 178187400 | G/C      | -2.15 | 2.8E-05 | -1.96 | 2.5E-04 |
| rs34164888             | chr6 | 25521693  | A/C      | 2.08  | 4.3E-07 | 1.98  | 4.1E-06 |
| rs214053               | chr6 | 25527735  | C/T      | -1.92 | 2.9E-08 | -1.81 | 6.0E-07 |
| rs129128               | chr6 | 26125114  | C/T      | -1.38 | 0.010   | -1.52 | 0.007   |
| rs9404952              | chr6 | 29836388  | A/G      | 1.55  | 6.7E-06 | 1.59  | 9.9E-06 |
| rs12665339             | chr6 | 30633455  | G/A      | 2.73  | 2.4E-10 | 2.93  | 7.3E-11 |
| rs2442730              | chr6 | 31351380  | C/A      | 2.22  | 1.4E-09 | 2.25  | 4.5E-09 |
| rs1050538              | chr6 | 31356822  | G/T      | 2.98  | 1.3E-10 | 3.24  | 2.4E-11 |
| rs9266658              | chr6 | 31379867  | A/G      | 3.68  | 8.6E-19 | 3.87  | 4.6E-19 |
| rs11575845             | chr6 | 31724609  | G/C      | -4.34 | 1.2E-05 | -4.70 | 5.1E-06 |
| rs9296095              | chr6 | 33574746  | C/T      | 6.07  | 3.8E-45 | 5.81  | 3.8E-38 |
| rs210143               | chr6 | 33579153  | T/C      | -5.66 | 5.7E-50 | -5.68 | 4.1E-46 |
| rs10807137             | chr6 | 34215249  | C/T      | -1.18 | 0.011   | -1.00 | 0.038   |
| rs2814983              | chr6 | 34623430  | G/A      | -1.70 | 0.001   | -1.67 | 0.003   |
| rs76976387             | chr6 | 36553586  | A/G      | 7.61  | 1.8E-10 | 8.11  | 7.9E-11 |
| rs9394951              | chr6 | 43383015  | C/T      | -1.42 | 4.3E-05 | -1.53 | 2.6E-05 |
| rs186369938            | chr6 | 43770246  | C/G      | 3.47  | 2.6E-05 | 3.36  | 1.0E-04 |
| rs11755026             | chr6 | 47352650  | A/G      | -1.42 | 0.015   | -1.25 | 0.042   |
| rs7772202              | chr6 | 47653843  | A/G      | 1.71  | 1.9E-05 | 1.74  | 3.2E-05 |
| rs614570               | chr6 | 52454453  | T/C      | 1.00  | 0.004   | 0.75  | 0.038   |
| rs6423287              | chr6 | 52798089  | G/T      | 1.27  | 3.0E-04 | 1.30  | 4.2E-04 |
| rs112273618,rs34208219 | chr6 | 109296454 | A/AAAG   | -1.46 | 2.4E-05 | -1.57 | 1.5E-05 |
| rs9374170              | chr6 | 110391788 | G/A      | 0.74  | 0.032   | 0.91  | 0.012   |
| rs35548455             | chr6 | 116399351 | T/C      | 1.63  | 0.010   | 1.68  | 0.011   |
| rs71686340,rs71698790  | chr6 | 134725909 | T/TAAAGG | 1.92  | 6.1E-06 | 1.74  | 9.6E-05 |
| rs6916729              | chr6 | 134887604 | T/A      | -4.95 | 3.3E-12 | -4.80 | 1.2E-10 |
| rs2210366              | chr6 | 135094070 | A/G      | -4.62 | 1.8E-31 | -4.86 | 1.0E-31 |
| rs6930223              | chr6 | 135103065 | G/T      | -2.30 | 2.4E-11 | -2.30 | 1.9E-10 |

|                                                 |      |           |                 |       |          |       |         |
|-------------------------------------------------|------|-----------|-----------------|-------|----------|-------|---------|
| rs9483788                                       | chr6 | 135114363 | C/T             | 6.50  | 1.2E-61  | 6.67  | 2.0E-59 |
| rs723388                                        | chr6 | 135207584 | G/A             | -2.70 | 3.1E-14  | -2.75 | 1.3E-13 |
| rs381500                                        | chr6 | 164057356 | A/C             | 2.12  | 6.5E-10  | 2.32  | 9.5E-11 |
| rs35069969                                      | chr7 | 2479055   | C/G             | 1.17  | 0.001    | 1.12  | 0.003   |
| rs2260230                                       | chr7 | 2783352   | A/I             | 1.33  | 5.5E-04  | 1.35  | 8.0E-04 |
| rs7789916                                       | chr7 | 13987932  | G/A             | 0.89  | 0.017    | 0.96  | 0.014   |
| rs67956034                                      | chr7 | 18189259  | T/C             | -1.55 | 1.5E-04  | -1.76 | 4.1E-05 |
| rs2710804                                       | chr7 | 36044919  | C/T             | 0.93  | 0.009    | 0.97  | 0.009   |
| rs13236163                                      | chr7 | 37403010  | C/T             | -1.22 | 0.008    | -1.21 | 0.013   |
| rs11762008                                      | chr7 | 44864065  | G/A             | -2.00 | 8.2E-09  | -2.21 | 1.0E-09 |
| rs3735485                                       | chr7 | 44969742  | A/G             | -1.25 | 0.009    | -1.24 | 0.013   |
| rs6592965                                       | chr7 | 50360284  | A/G             | 1.37  | 9.1E-05  | 1.35  | 2.3E-04 |
| rs4947490                                       | chr7 | 55092845  | A/G             | -1.01 | 0.007    | -1.03 | 0.009   |
| rs13247874                                      | chr7 | 73596112  | T/C             | -1.06 | 0.014    | -0.77 | 0.086   |
| rs8565                                          | chr7 | 76000956  | T/C             | 0.91  | 0.023    | 0.82  | 0.049   |
| rs11764390                                      | chr7 | 80586889  | A/G             | 0.79  | 0.022    | 0.74  | 0.041   |
| rs35574453, rs397976140, rs566083700, rs4385401 | chr7 | 80605492  | GA/G            | 2.05  | 0.005    | 1.80  | 0.019   |
| rs62482241                                      | chr7 | 100501843 | C/T             | 2.62  | 3.7E-09  | 2.75  | 3.2E-09 |
| rs342293                                        | chr7 | 106731773 | G/C             | -3.57 | 6.0E-25  | -3.77 | 1.9E-25 |
| rs12706108                                      | chr7 | 116872215 | C/T             | -1.37 | 6.8E-04  | -1.49 | 3.9E-04 |
| rs689341                                        | chr7 | 123763920 | A/C             | -1.05 | 0.004    | -1.21 | 0.002   |
| rs79947009                                      | chr7 | 123776519 | G/T             | 4.26  | 4.1E-10  | 4.60  | 1.0E-10 |
| rs140553648                                     | chr7 | 129612295 | CGCGGGCG<br>G/C | 2.35  | 0.002    | 2.41  | 0.002   |
| rs11556924                                      | chr7 | 130023656 | T/C             | 1.51  | 3.3E-05  | 1.35  | 3.8E-04 |
| rs62471615                                      | chr7 | 131062196 | C/A             | 1.41  | 2.7E-04  | 1.26  | 0.002   |
| rs7806221                                       | chr7 | 135634031 | C/T             | -1.38 | 1.2E-04  | -1.50 | 6.3E-05 |
| rs73164936                                      | chr7 | 135983054 | G/A             | 2.11  | 0.001    | 1.98  | 0.003   |
| rs75511207                                      | chr7 | 140181500 | C/T             | -2.48 | 2.3E-05  | -2.71 | 1.0E-05 |
| rs7808461                                       | chr7 | 152684513 | T/G             | 0.99  | 0.004    | 0.95  | 0.008   |
| rs1153998                                       | chr7 | 158827968 | C/T             | 2.32  | 0.009    | 1.58  | 0.087   |
| rs36056437                                      | chr8 | 8935355   | T/G             | -1.19 | 5.0E-04  | -1.21 | 7.3E-04 |
| rs200119611                                     | chr8 | 21995826  | GT/G            | -2.52 | 0.039    | -2.63 | 0.039   |
| rs11779638                                      | chr8 | 22582695  | C/A             | 1.88  | 1.9E-05  | 2.04  | 9.0E-06 |
| rs6985703                                       | chr8 | 55872574  | T/G             | -0.68 | 0.048    | -0.64 | 0.075   |
| rs61709988                                      | chr8 | 65976651  | C/T             | -1.93 | 9.4E-08  | -2.10 | 2.7E-08 |
| rs6993770                                       | chr8 | 105569300 | T/A             | -3.94 | 1.3E-21  | -3.96 | 4.1E-20 |
| rs28455756                                      | chr8 | 124881909 | T/C             | 0.73  | 0.045    | 0.66  | 0.086   |
| rs7010394                                       | chr8 | 125331278 | T/C             | -1.02 | 0.003    | -0.93 | 0.011   |
| rs62523770                                      | chr8 | 129646924 | T/G             | 1.53  | 3.7E-04  | 1.35  | 0.003   |
| rs1158570                                       | chr8 | 130318827 | T/C             | -0.70 | 0.041    | -0.63 | 0.080   |
| rs35858667                                      | chr8 | 143920720 | A/G             | 2.36  | 0.002    | 2.39  | 0.003   |
| rs11993233                                      | chr8 | 143928115 | G/A             | 2.47  | 3.7E-12  | 2.51  | 1.8E-11 |
| rs139204327, rs3831137, rs71312798, rs9406914   | chr9 | 273145    | TTG/T           | -1.11 | 0.005    | -0.80 | 0.052   |
| rs10970979                                      | chr9 | 277776    | T/C             | 1.03  | 0.020    | 1.10  | 0.018   |
| rs10970979                                      | chr9 | 334337    | G/A             | -1.18 | 0.002    | -0.88 | 0.027   |
| rs34881325                                      | chr9 | 2622134   | T/C             | 1.05  | 0.003    | 0.92  | 0.013   |
| rs62540578                                      | chr9 | 4741387   | G/C             | -1.96 | 2.4E-08  | -2.26 | 8.2E-10 |
| rs118088097                                     | chr9 | 4762085   | A/G             | -6.85 | 2.1E-43  | -6.81 | 3.0E-39 |
| rs10974771                                      | chr9 | 4762737   | G/C             | -3.81 | 6.0E-20  | -4.06 | 1.6E-20 |
| rs409950                                        | chr9 | 4763368   | A/C             | 3.73  | 1.3E-17  | 3.71  | 4.6E-16 |
| rs10815071                                      | chr9 | 4763484   | G/A             | -3.94 | 4.3E-30  | -4.10 | 1.2E-29 |
| rs12005199                                      | chr9 | 4763491   | A/G             | 7.70  | 5.8E-100 | 7.95  | 2.2E-97 |
| rs368418                                        | chr9 | 4768336   | A/G             | -3.25 | 3.4E-12  | -3.29 | 1.9E-11 |

|                        |       |           |       |        |         |        |         |
|------------------------|-------|-----------|-------|--------|---------|--------|---------|
| rs117857686            | chr9  | 4807471   | T/C   | 4.29   | 0.001   | 3.93   | 0.005   |
| rs79075814             | chr9  | 4808971   | T/C   | -5.52  | 4.0E-25 | -5.72  | 1.3E-24 |
| rs10974808             | chr9  | 4840380   | G/A   | 8.30   | 6.7E-77 | 8.44   | 1.6E-72 |
| rs117935834            | chr9  | 4887853   | G/A   | 5.12   | 9.1E-05 | 5.15   | 1.7E-04 |
| rs12338005             | chr9  | 4898136   | A/G   | -1.54  | 6.6E-05 | -1.38  | 6.5E-04 |
| rs2381194              | chr9  | 4959331   | A/G   | -2.28  | 8.8E-06 | -2.27  | 2.5E-05 |
| rs10815146             | chr9  | 5015901   | T/A   | 1.69   | 1.0E-06 | 1.67   | 3.9E-06 |
| rs12004239             | chr9  | 5057822   | A/C   | 9.49   | 8.1E-07 | 10.21  | 3.9E-07 |
| rs191064596            | chr9  | 5271995   | T/C   | 11.53  | 5.5E-06 | 11.62  | 1.1E-05 |
| rs3731211              | chr9  | 21986848  | T/A   | -2.60  | 1.4E-11 | -2.54  | 2.8E-10 |
| rs10757287             | chr9  | 22143571  | T/A   | -2.46  | 8.1E-06 | -2.56  | 9.0E-06 |
| rs741917               | chr9  | 35707057  | T/C   | -1.12  | 0.005   | -1.18  | 0.005   |
| rs10973700             | chr9  | 38196120  | G/C   | 1.26   | 2.6E-04 | 1.41   | 1.1E-04 |
| rs12000252             | chr9  | 70423047  | G/A   | -1.20  | 5.1E-04 | -1.21  | 8.2E-04 |
| rs142550358            | chr9  | 88777771  | T/TTC | -4.81  | 2.8E-12 | -5.13  | 1.1E-12 |
| rs772407               | chr9  | 90798568  | C/A   | 1.40   | 4.8E-05 | 1.24   | 5.7E-04 |
| rs112679102            | chr9  | 91167740  | T/C   | -1.74  | 0.008   | -1.68  | 0.014   |
| rs1853427              | chr9  | 92806161  | C/T   | 0.93   | 0.026   | 0.88   | 0.043   |
| rs10990535             | chr9  | 96328727  | T/C   | 2.82   | 6.9E-12 | 2.81   | 7.0E-11 |
| rs10820727             | chr9  | 96495705  | A/G   | -1.57  | 0.001   | -1.36  | 0.008   |
| rs114266868            | chr9  | 97951319  | C/T   | 1.67   | 3.7E-06 | 1.54   | 4.2E-05 |
| rs10817007             | chr9  | 110392967 | G/T   | 2.16   | 2.2E-04 | 2.28   | 2.0E-04 |
| rs10116799             | chr9  | 113422027 | T/C   | 1.70   | 0.001   | 1.80   | 9.3E-04 |
| rs2900177              | chr9  | 120735367 | C/T   | -1.67  | 7.5E-06 | -1.69  | 1.5E-05 |
| rs10986338             | chr9  | 124428953 | G/A   | 0.83   | 0.022   | 0.71   | 0.061   |
| rs13289095             | chr9  | 128704210 | T/G   | -2.26  | 3.1E-06 | -2.28  | 7.6E-06 |
| rs60757417             | chr9  | 132989049 | G/C   | -4.39  | 4.0E-11 | -4.52  | 8.5E-11 |
| rs150813342            | chr9  | 132989126 | T/C   | -27.53 | 7.0E-91 | -27.28 | 5.9E-82 |
| rs13284142             | chr9  | 133001148 | G/C   | 2.24   | 9.2E-11 | 2.03   | 2.3E-08 |
| rs8176746              | chr9  | 133255935 | T/G   | -1.45  | 0.038   | -1.77  | 0.016   |
| rs2520099              | chr9  | 134053017 | C/T   | 1.62   | 2.7E-05 | 1.66   | 4.1E-05 |
| rs7912035              | chr10 | 3665123   | T/C   | -2.08  | 2.2E-05 | -2.32  | 5.6E-06 |
| rs34346558             | chr10 | 11862835  | C/A   | 1.96   | 7.6E-06 | 1.78   | 1.0E-04 |
| rs943188               | chr10 | 14542302  | T/C   | 1.08   | 0.004   | 1.34   | 5.7E-04 |
| rs802171               | chr10 | 16814686  | A/G   | 1.15   | 7.9E-04 | 1.07   | 0.003   |
| rs7085742              | chr10 | 17206829  | C/G   | 1.38   | 5.6E-05 | 1.30   | 3.0E-04 |
| rs11014291             | chr10 | 24909758  | C/T   | -1.45  | 5.3E-05 | -1.50  | 6.3E-05 |
| rs866919               | chr10 | 30224354  | C/T   | -1.79  | 3.4E-07 | -1.77  | 1.3E-06 |
| rs61848370             | chr10 | 49069530  | T/G   | -1.80  | 4.7E-06 | -1.92  | 2.8E-06 |
| rs10740059             | chr10 | 62049768  | A/G   | 0.72   | 0.041   | 0.74   | 0.044   |
| rs224033               | chr10 | 62762354  | C/G   | -0.69  | 0.048   | -0.64  | 0.078   |
| rs10761731, rs71476393 | chr10 | 63267850  | T/A   | 3.87   | 5.2E-29 | 4.00   | 2.0E-28 |
| rs186167801            | chr10 | 63453066  | T/G   | -6.17  | 0.002   | -5.15  | 0.014   |
| rs10762859             | chr10 | 79343614  | A/T   | 0.80   | 0.021   | 1.16   | 0.001   |
| rs116052829            | chr10 | 79404390  | T/C   | 2.13   | 3.9E-04 | 1.86   | 0.003   |
| rs11202654             | chr10 | 88098060  | G/A   | 1.30   | 0.013   | 1.39   | 0.011   |
| rs2068888              | chr10 | 93079885  | A/G   | -1.66  | 1.7E-06 | -1.91  | 1.4E-07 |
| rs11190127             | chr10 | 99512225  | A/C   | -0.99  | 0.006   | -1.17  | 0.002   |
| rs71016384             | chr10 | 102469616 | AG/A  | 2.28   | 9.5E-07 | 2.81   | 7.9E-09 |
| rs911547               | chr10 | 103879663 | G/A   | 2.08   | 2.0E-05 | 2.14   | 2.7E-05 |
| rs10886430             | chr10 | 119250744 | G/A   | -1.20  | 0.021   | -0.91  | 0.093   |
| rs11604127             | chr11 | 196944    | T/C   | 5.27   | 7.4E-40 | 5.31   | 3.0E-37 |
| rs9704108              | chr11 | 308065    | T/C   | -2.85  | 2.3E-06 | -2.82  | 7.3E-06 |
| rs12806645             | chr11 | 5677225   | A/G   | 0.94   | 0.009   | 0.72   | 0.056   |

|                         |       |           |       |        |         |        |         |
|-------------------------|-------|-----------|-------|--------|---------|--------|---------|
| rs10769966              | chr11 | 8825494   | A/C   | -1.61  | 2.7E-06 | -1.74  | 1.3E-06 |
| rs2645029               | chr11 | 9790689   | G/A   | 1.38   | 0.009   | 1.48   | 0.008   |
| rs10840453              | chr11 | 10643354  | T/C   | -1.06  | 0.006   | -0.99  | 0.014   |
| rs602126                | chr11 | 32889926  | C/T   | 1.50   | 5.0E-04 | 1.55   | 6.1E-04 |
| rs35741412              | chr11 | 47410213  | A/G   | 3.25   | 3.8E-04 | 3.29   | 5.9E-04 |
| rs3817334               | chr11 | 47629441  | T/C   | -1.81  | 1.9E-07 | -1.77  | 1.2E-06 |
| rs10750866              | chr11 | 57637306  | G/A   | 2.60   | 9.5E-11 | 2.49   | 2.9E-09 |
| rs174560                | chr11 | 61814292  | C/T   | 3.10   | 6.6E-18 | 3.17   | 3.3E-17 |
| rs477895                | chr11 | 64281440  | C/T   | -2.08  | 2.3E-05 | -2.04  | 7.0E-05 |
| rs11227261              | chr11 | 65695372  | G/C   | -1.04  | 0.004   | -1.02  | 0.006   |
| rs667555                | chr11 | 65857091  | A/C   | -1.90  | 2.5E-07 | -2.04  | 1.1E-07 |
| rs11602052              | chr11 | 69197107  | C/G   | 1.87   | 1.6E-07 | 1.72   | 4.2E-06 |
| rs6592656               | chr11 | 76657010  | G/C   | 0.98   | 0.005   | 0.87   | 0.016   |
| rs585721                | chr11 | 77842592  | C/T   | 1.15   | 0.001   | 1.18   | 0.001   |
| rs556562                | chr11 | 85955397  | A/C   | -1.02  | 0.027   | -1.25  | 0.009   |
| rs646809                | chr11 | 95101707  | C/T   | -1.34  | 0.001   | -1.32  | 0.003   |
| rs7934719               | chr11 | 108471137 | T/C   | 1.62   | 6.4E-06 | 1.81   | 1.6E-06 |
| rs73000929              | chr11 | 114082900 | A/G   | -4.08  | 3.9E-07 | -4.37  | 2.1E-07 |
| rs73000965              | chr11 | 114111599 | A/T   | -1.05  | 0.004   | -0.99  | 0.009   |
| rs964184                | chr11 | 116778201 | G/C   | -1.63  | 0.002   | -1.72  | 0.002   |
| rs77953286              | chr11 | 117043946 | C/G   | -3.51  | 4.4E-05 | -3.45  | 1.2E-04 |
| rs4938637               | chr11 | 119204613 | A/G   | 5.72   | 4.3E-13 | 5.86   | 1.3E-12 |
| rs2155380               | chr11 | 119209327 | G/A   | 3.40   | 3.0E-19 | 3.45   | 2.6E-18 |
| rs35929108              | chr11 | 119315038 | A/G   | 3.16   | 1.5E-06 | 3.50   | 3.8E-07 |
| rs6589810               | chr11 | 120363199 | A/G   | 1.25   | 2.8E-04 | 1.14   | 0.002   |
| rs4570592               | chr11 | 126417890 | G/A   | 1.10   | 0.001   | 1.38   | 1.3E-04 |
| rs7925737               | chr11 | 128164127 | T/C   | 1.92   | 1.4E-04 | 1.76   | 8.7E-04 |
| rs4937333               | chr11 | 128460625 | T/C   | 1.69   | 9.2E-07 | 1.60   | 9.8E-06 |
| rs11221442              | chr11 | 128707729 | C/G   | -1.20  | 0.002   | -1.32  | 9.2E-04 |
| rs2268607               | chr11 | 128797533 | C/T   | -1.94  | 2.9E-04 | -1.68  | 0.003   |
| rs10774375              | chr12 | 614736    | A/G   | -0.95  | 0.007   | -1.17  | 0.002   |
| rs34038797              | chr12 | 630843    | G/C   | -1.48  | 2.2E-05 | -1.82  | 6.5E-07 |
| rs216311                | chr12 | 6019277   | T/C   | -1.20  | 6.6E-04 | -1.40  | 1.5E-04 |
| rs7306706               | chr12 | 6106468   | G/A   | 0.80   | 0.022   | 0.81   | 0.025   |
| rs10849413              | chr12 | 6176701   | A/G   | 2.19   | 2.1E-10 | 2.36   | 7.0E-11 |
| rs887477                | chr12 | 6336816   | A/C   | 1.31   | 1.4E-04 | 1.61   | 8.0E-06 |
| rs28999107              | chr12 | 6383934   | T/G   | -1.82  | 2.0E-07 | -1.91  | 2.0E-07 |
| rs2364482               | chr12 | 6392965   | G/T   | 1.83   | 6.9E-05 | 1.95   | 4.9E-05 |
| rs12820720              | chr12 | 8000056   | T/C   | -0.76  | 0.032   | -0.72  | 0.054   |
| rs3093733, rs72525724   | chr12 | 12719550  | CA/C  | 1.01   | 0.011   | 1.20   | 0.004   |
| rs76639840              | chr12 | 22457358  | C/G   | -7.61  | 4.4E-06 | -7.52  | 1.5E-05 |
| rs35024086, rs398098094 | chr12 | 29282572  | TA/T  | -2.72  | 3.3E-15 | -2.57  | 1.2E-12 |
| rs7960662               | chr12 | 40085265  | A/G   | -1.22  | 5.4E-04 | -1.16  | 0.002   |
| rs17442910              | chr12 | 40156900  | C/T   | -10.03 | 0.038   | -11.65 | 0.022   |
| rs146762874             | chr12 | 46542717  | C/G   | 2.93   | 7.9E-06 | 3.10   | 6.7E-06 |
| rs11168249              | chr12 | 47814585  | T/C   | -2.22  | 1.4E-10 | -2.25  | 5.6E-10 |
| rs73109811              | chr12 | 47818936  | T/C   | 3.12   | 1.3E-15 | 3.18   | 7.4E-15 |
| rs113736796             | chr12 | 47819937  | G/C   | 3.23   | 8.7E-05 | 3.50   | 4.7E-05 |
| rs113543437             | chr12 | 49258948  | A/G   | -2.43  | 1.3E-04 | -2.33  | 4.5E-04 |
| rs35082997, rs397713263 | chr12 | 50506605  | A/AGT | -2.25  | 4.8E-10 | -2.15  | 1.2E-08 |
| rs7133314               | chr12 | 51270728  | T/C   | 2.53   | 3.3E-06 | 2.70   | 2.0E-06 |
| rs79977579              | chr12 | 54300776  | A/C   | 4.66   | 2.3E-14 | 4.86   | 2.9E-14 |
| rs10876550              | chr12 | 54318524  | G/A   | -3.36  | 5.0E-22 | -3.34  | 6.5E-20 |
| rs10783794              | chr12 | 56593395  | G/A   | 1.75   | 8.9E-07 | 1.81   | 1.2E-06 |



|                         |       |           |         |        |         |        |         |
|-------------------------|-------|-----------|---------|--------|---------|--------|---------|
| rs7138821               | chr12 | 56796206  | C/A     | 2.04   | 4.0E-08 | 2.07   | 9.6E-08 |
| rs1716505               | chr12 | 64611299  | G/C     | 2.89   | 7.3E-15 | 2.88   | 1.2E-13 |
| rs146785420             | chr12 | 64646112  | A/ATTAT | 2.20   | 2.4E-05 | 2.45   | 7.3E-06 |
| rs117543282             | chr12 | 64666533  | A/G     | -2.97  | 0.003   | -3.38  | 0.001   |
| rs76982746              | chr12 | 64669405  | A/G     | -7.12  | 5.7E-06 | -7.41  | 6.4E-06 |
| rs113825134             | chr12 | 77826960  | A/G     | -1.16  | 0.004   | -1.26  | 0.002   |
| rs35124423, rs398098391 | chr12 | 93411631  | TA/T    | 1.71   | 2.9E-04 | 1.50   | 0.002   |
| rs11107928              | chr12 | 95182175  | A/C     | 2.30   | 0.001   | 2.51   | 7.3E-04 |
| rs6606735               | chr12 | 109051638 | T/C     | 2.71   | 1.6E-14 | 2.79   | 5.2E-14 |
| rs187790190             | chr12 | 111187301 | A/G     | -4.97  | 0.007   | -5.58  | 0.004   |
| rs4766453               | chr12 | 111254320 | T/C     | -1.77  | 3.0E-06 | -1.56  | 9.3E-05 |
| rs3809272               | chr12 | 111362454 | A/G     | -5.54  | 8.0E-50 | -5.49  | 7.0E-45 |
| rs575760658             | chr12 | 111420391 | G/A     | -6.99  | 6.3E-15 | -6.56  | 2.9E-12 |
| rs72650673              | chr12 | 111447506 | A/G     | 38.68  | 2.7E-09 | 37.53  | 3.6E-08 |
| rs146378570             | chr12 | 111481102 | A/G     | -8.75  | 6.1E-11 | -9.63  | 7.7E-12 |
| rs117532831             | chr12 | 111599646 | A/G     | -5.72  | 4.8E-23 | -5.82  | 6.4E-22 |
| rs148019457             | chr12 | 111603681 | T/C     | -6.24  | 2.8E-07 | -7.02  | 3.3E-08 |
| rs11065987              | chr12 | 111634620 | G/A     | 5.97   | 1.9E-61 | 6.06   | 7.3E-58 |
| rs147237662             | chr12 | 112118750 | T/C     | -8.10  | 0.001   | -8.31  | 0.001   |
| rs116999150             | chr12 | 112479345 | G/A     | -3.95  | 2.0E-04 | -4.09  | 2.6E-04 |
| rs35429                 | chr12 | 115118062 | G/A     | -1.56  | 9.2E-06 | -1.32  | 3.2E-04 |
| rs7310409               | chr12 | 120987058 | A/G     | -1.03  | 0.004   | -1.10  | 0.003   |
| rs11553699              | chr12 | 121779004 | G/A     | -4.91  | 1.6E-23 | -5.41  | 7.8E-26 |
| rs1270594               | chr12 | 123208418 | A/T     | -1.90  | 2.3E-06 | -1.69  | 6.0E-05 |
| rs35817718              | chr13 | 32567803  | A/C     | 1.42   | 6.9E-05 | 1.57   | 2.6E-05 |
| rs61963266              | chr13 | 40596899  | A/G     | 1.69   | 1.0E-04 | 1.71   | 1.6E-04 |
| rs9590569               | chr13 | 41010554  | C/T     | -1.95  | 4.6E-07 | -1.91  | 2.1E-06 |
| rs7983902               | chr13 | 46671509  | G/C     | -1.02  | 0.004   | -1.00  | 0.006   |
| rs480243                | chr13 | 50847016  | G/A     | 0.86   | 0.014   | 0.91   | 0.013   |
| rs670180                | chr13 | 70662479  | T/A     | -1.56  | 8.9E-06 | -1.43  | 1.0E-04 |
| rs4148445               | chr13 | 95245105  | C/T     | -3.91  | 2.3E-08 | -3.96  | 5.9E-08 |
| rs4773860               | chr13 | 95248987  | C/T     | -1.98  | 1.6E-08 | -1.80  | 8.0E-07 |
| rs11841319              | chr13 | 109840279 | T/C     | -3.52  | 3.5E-09 | -3.43  | 3.8E-08 |
| rs336248                | chr13 | 109859213 | G/C     | 1.50   | 8.2E-04 | 1.50   | 0.001   |
| rs544012                | chr13 | 110226292 | T/G     | -1.58  | 4.7E-05 | -1.57  | 1.1E-04 |
| rs750598                | chr13 | 110376631 | A/G     | -0.90  | 0.014   | -1.04  | 0.006   |
| rs7319994               | chr13 | 113355025 | G/I     | -2.47  | 0.001   | -2.40  | 0.002   |
| rs4907618               | chr13 | 113360700 | A/G     | 0.85   | 0.016   | 0.71   | 0.054   |
| rs34723659, rs565104997 | chr14 | 30903115  | G/GCT   | -0.94  | 0.018   | -0.81  | 0.051   |
| rs2934701               | chr14 | 50666569  | T/A     | -0.82  | 0.017   | -0.72  | 0.045   |
| rs8011233               | chr14 | 53121039  | C/A     | -1.95  | 1.7E-05 | -2.01  | 2.2E-05 |
| rs11627485              | chr14 | 65020976  | C/T     | 1.67   | 1.3E-06 | 1.69   | 2.5E-06 |
| rs11158588              | chr14 | 65333158  | G/A     | -1.86  | 4.6E-05 | -1.95  | 4.2E-05 |
| rs11622135              | chr14 | 68001175  | A/G     | -2.94  | 1.6E-10 | -3.18  | 3.9E-11 |
| rs194730                | chr14 | 68840768  | G/A     | -1.56  | 5.7E-05 | -1.53  | 1.6E-04 |
| rs7149929               | chr14 | 68864058  | G/A     | 1.05   | 0.012   | 1.23   | 0.005   |
| rs117672662             | chr14 | 68958750  | C/T     | -18.52 | 3.2E-04 | -18.43 | 6.0E-04 |
| rs10220411              | chr14 | 68985371  | G/A     | 1.20   | 0.003   | 1.30   | 0.002   |
| rs116735454             | chr14 | 69087518  | C/T     | 5.86   | 1.1E-09 | 5.86   | 5.2E-09 |
| rs4083463               | chr14 | 81389979  | A/G     | -1.11  | 0.002   | -1.19  | 0.002   |
| rs36084521              | chr14 | 93050053  | G/T     | 3.19   | 1.9E-11 | 3.33   | 1.8E-11 |
| rs17580                 | chr14 | 94380925  | A/T     | 1.93   | 0.045   | 1.91   | 0.056   |
| rs7148436               | chr14 | 100707574 | C/G     | -3.12  | 1.0E-13 | -3.26  | 1.2E-13 |
| rs1555405               | chr14 | 100710432 | A/G     | -3.45  | 3.2E-20 | -3.85  | 7.0E-23 |

|                                      |       |           |          |        |         |        |         |
|--------------------------------------|-------|-----------|----------|--------|---------|--------|---------|
| rs4906212                            | chr14 | 102515258 | T/C      | -2.08  | 3.8E-07 | -1.83  | 2.1E-05 |
| rs2146430                            | chr14 | 102605488 | G/T      | -2.78  | 4.7E-14 | -2.68  | 3.6E-12 |
| rs10138008                           | chr14 | 102752567 | G/C      | -0.96  | 0.008   | -1.02  | 0.006   |
| rs2297066                            | chr14 | 103100498 | G/C      | 3.10   | 1.0E-13 | 3.30   | 3.6E-14 |
| rs744153                             | chr14 | 103110107 | G/C      | -1.52  | 5.7E-04 | -1.73  | 1.7E-04 |
| rs2497296                            | chr14 | 104178439 | T/C      | 1.58   | 2.7E-05 | 1.40   | 3.5E-04 |
| rs7146643                            | chr14 | 105291055 | C/T      | 1.93   | 9.8E-08 | 1.75   | 3.6E-06 |
| rs10681907, rs397750208              | chr15 | 38986960  | CTTAAA/C | 2.01   | 4.7E-09 | 1.90   | 1.2E-07 |
| rs17687755                           | chr15 | 41937640  | C/G      | 0.83   | 0.028   | 0.94   | 0.017   |
| rs139974673                          | chr15 | 43735687  | C/T      | 5.78   | 3.7E-08 | 6.50   | 3.0E-09 |
| rs68191015                           | chr15 | 50096143  | G/T      | 1.09   | 0.004   | 1.15   | 0.004   |
| rs1158246                            | chr15 | 56893771  | G/A      | -2.22  | 1.3E-07 | -2.68  | 9.7E-10 |
| rs11071720                           | chr15 | 63049797  | T/C      | -3.42  | 3.8E-20 | -3.49  | 2.8E-19 |
| rs138843544                          | chr15 | 63071291  | C/T      | 2.45   | 0.017   | 2.23   | 0.037   |
| rs367966675, rs749807805             | chr15 | 64591430  | AAAAC/A  | -1.61  | 0.009   | -1.65  | 0.011   |
| rs141601939                          | chr15 | 64804508  | C/CT     | 3.02   | 0.002   | 2.96   | 0.004   |
| rs1684036                            | chr15 | 64843126  | T/C      | -0.86  | 0.015   | -0.87  | 0.019   |
| rs149678861                          | chr15 | 64882295  | G/A      | -8.34  | 1.6E-05 | -7.38  | 2.6E-04 |
| rs1719263                            | chr15 | 64883993  | T/G      | 3.13   | 7.4E-11 | 3.27   | 6.5E-11 |
| rs12591119                           | chr15 | 75063603  | G/A      | -1.29  | 0.007   | -1.39  | 0.006   |
| rs8028409                            | chr15 | 90963192  | T/A      | -2.17  | 6.7E-06 | -1.79  | 3.7E-04 |
| rs4965426                            | chr15 | 98704812  | A/G      | -2.12  | 6.6E-05 | -2.20  | 7.9E-05 |
| rs140249978, rs866153759             | chr16 | 448906    | A/ACT    | 2.75   | 1.4E-06 | 2.99   | 5.1E-07 |
| rs1298104                            | chr16 | 4386444   | A/G      | 1.25   | 0.033   | 1.01   | 0.099   |
| rs9937661                            | chr16 | 4970513   | C/T      | -1.24  | 3.3E-04 | -1.20  | 8.8E-04 |
| rs34890846, rs59246045               | chr16 | 8947636   | ATTG/A   | -1.17  | 0.009   | -1.29  | 0.006   |
| rs2021511                            | chr16 | 11251046  | T/C      | 1.97   | 6.1E-07 | 1.84   | 8.9E-06 |
| rs151234                             | chr16 | 28494339  | C/G      | 4.33   | 4.8E-16 | 4.47   | 9.5E-16 |
| rs8050500                            | chr16 | 31393250  | C/T      | 1.04   | 0.003   | 1.23   | 7.1E-04 |
| rs56088754                           | chr16 | 53124307  | G/A      | 0.98   | 0.011   | 0.73   | 0.072   |
| rs3114409                            | chr16 | 68698146  | C/A      | 1.19   | 0.002   | 1.08   | 0.008   |
| rs4888387                            | chr16 | 75355857  | T/G      | -0.82  | 0.019   | -0.90  | 0.014   |
| rs2738502                            | chr16 | 78536644  | G/C      | -0.87  | 0.019   | -0.81  | 0.037   |
| rs57652769                           | chr16 | 79720079  | T/C      | 1.64   | 2.3E-05 | 1.65   | 4.9E-05 |
| rs12445050                           | chr16 | 81837364  | T/C      | -1.52  | 0.008   | -1.19  | 0.047   |
| rs8056420                            | chr16 | 85378035  | G/A      | -1.01  | 0.024   | -0.96  | 0.041   |
| rs4783185                            | chr16 | 85382020  | A/G      | 1.80   | 5.9E-04 | 2.33   | 2.0E-05 |
| rs9934875                            | chr16 | 85398690  | G/C      | 0.74   | 0.035   | 0.60   | 0.102   |
| rs1049868                            | chr16 | 85673027  | C/T      | 1.47   | 1.1E-04 | 1.42   | 3.3E-04 |
| rs7200918                            | chr16 | 87854513  | C/T      | 1.29   | 4.6E-04 | 1.32   | 5.6E-04 |
| rs17175830                           | chr16 | 88491756  | A/G      | 1.58   | 5.1E-05 | 1.92   | 2.3E-06 |
| rs13332145                           | chr16 | 89014667  | G/A      | 1.11   | 0.011   | 1.04   | 0.023   |
| rs7225843                            | chr17 | 2098531   | C/T      | -1.31  | 0.001   | -1.35  | 0.002   |
| rs7213347                            | chr17 | 2249963   | G/C      | 2.34   | 6.2E-10 | 2.46   | 4.9E-10 |
| rs1985205                            | chr17 | 3912626   | T/C      | -1.07  | 0.006   | -0.90  | 0.026   |
| rs141336258                          | chr17 | 4921551   | C/T      | -4.65  | 0.001   | -5.85  | 9.9E-05 |
| rs56337033                           | chr17 | 4932332   | T/C      | -12.50 | 0.002   | -11.85 | 0.004   |
| rs2243103                            | chr17 | 4936105   | G/C      | 5.22   | 1.1E-16 | 5.19   | 2.5E-15 |
| rs238241                             | chr17 | 4947777   | A/G      | -4.61  | 3.6E-10 | -4.36  | 1.4E-08 |
| rs141179182                          | chr17 | 4947784   | A/C      | -5.64  | 0.023   | -7.18  | 0.005   |
| rs150324550                          | chr17 | 7364266   | AT/A     | -1.39  | 0.002   | -1.30  | 0.005   |
| rs112843870, rs34157498, rs397817394 | chr17 | 7854407   | T/TA     | 1.60   | 7.8E-06 | 1.38   | 2.5E-04 |
| rs9907984                            | chr17 | 29399133  | G/A      | -2.08  | 2.6E-06 | -2.33  | 5.0E-07 |
| rs8065958                            | chr17 | 29465512  | T/A      | 2.42   | 2.0E-12 | 2.64   | 2.0E-13 |

|                          |       |          |                  |        |         |        |         |
|--------------------------|-------|----------|------------------|--------|---------|--------|---------|
| rs1048317                | chr17 | 31376984 | T/C              | -1.28  | 3.4E-04 | -1.51  | 4.7E-05 |
| rs79007502               | chr17 | 35553286 | C/T              | 5.25   | 2.5E-05 | 6.10   | 3.0E-06 |
| rs7503168                | chr17 | 35558885 | G/A              | 3.05   | 1.9E-10 | 3.29   | 5.5E-11 |
| rs201192867              | chr17 | 35572827 | C/CCT            | 4.68   | 3.6E-05 | 4.48   | 1.6E-04 |
| rs16971207               | chr17 | 35614725 | T/A              | 3.79   | 0.004   | 2.64   | 0.052   |
| rs1112173                | chr17 | 37399966 | T/C              | 1.00   | 0.004   | 1.13   | 0.002   |
| rs375677                 | chr17 | 44031606 | A/C              | 1.95   | 8.2E-06 | 1.79   | 9.1E-05 |
| rs186330160              | chr17 | 44365997 | T/C              | -13.07 | 0.003   | -15.00 | 0.001   |
| rs25552, rs34603233      | chr17 | 44377654 | T/TGAGCCC<br>CTG | -1.86  | 1.5E-07 | -1.98  | 8.2E-08 |
| rs150568286              | chr17 | 44517387 | A/G              | -15.01 | 2.3E-10 | -15.77 | 1.7E-10 |
| rs745804299              | chr17 | 44765782 | A/G              | -26.21 | 5.5E-20 | -25.52 | 1.4E-17 |
| rs150497606              | chr17 | 57389065 | A/G              | -3.19  | 9.2E-05 | -3.31  | 1.0E-04 |
| rs2632516                | chr17 | 58331728 | C/G              | 1.43   | 3.0E-05 | 1.66   | 4.0E-06 |
| rs16943520               | chr17 | 59422422 | T/C              | -1.30  | 7.9E-04 | -1.17  | 0.004   |
| rs8178824                | chr17 | 66228657 | T/C              | 5.23   | 0.002   | 4.87   | 0.005   |
| rs77542162               | chr17 | 69085137 | G/A              | -2.93  | 0.008   | -2.85  | 0.013   |
| rs2034309                | chr17 | 74691926 | C/T              | -1.38  | 5.2E-04 | -1.42  | 5.9E-04 |
| rs10541233               | chr18 | 9617853  | CTG/C            | -1.17  | 0.006   | -1.31  | 0.003   |
| rs11082304               | chr18 | 23141009 | G/T              | 3.16   | 4.1E-20 | 3.10   | 6.9E-18 |
| rs74997723               | chr18 | 44416285 | G/C              | 2.90   | 7.3E-09 | 2.77   | 1.2E-07 |
| rs4890487                | chr18 | 44650207 | A/C              | -1.38  | 8.0E-05 | -1.32  | 3.3E-04 |
| rs718515                 | chr18 | 46276334 | G/A              | 0.74   | 0.030   | 0.96   | 0.007   |
| rs72969820               | chr18 | 59677958 | T/C              | -1.46  | 0.005   | -1.52  | 0.005   |
| rs17758695               | chr18 | 63253621 | T/C              | -6.08  | 1.1E-11 | -5.64  | 1.5E-09 |
| rs1865761                | chr18 | 69872156 | C/T              | -0.68  | 0.049   | -0.93  | 0.010   |
| rs113205391              | chr18 | 69950261 | G/C              | -5.19  | 2.9E-04 | -5.99  | 6.7E-05 |
| rs142316985, rs367640262 | chr18 | 75196910 | C/CAATT          | -2.46  | 0.002   | -2.27  | 0.006   |
| rs12985107               | chr19 | 1163597  | G/A              | 1.03   | 0.009   | 1.06   | 0.010   |
| rs8100043                | chr19 | 2005645  | G/A              | 1.72   | 2.2E-04 | 1.87   | 1.2E-04 |
| rs8106212                | chr19 | 6802560  | T/C              | -11.26 | 0.001   | -11.44 | 0.002   |
| rs34536443               | chr19 | 10352442 | C/G              | -3.78  | 7.2E-06 | -3.70  | 2.7E-05 |
| rs113906245              | chr19 | 10473649 | T/C              | -3.69  | 0.020   | -4.06  | 0.014   |
| rs34855805               | chr19 | 15272771 | A/C              | 1.33   | 0.002   | 1.58   | 5.8E-04 |
| rs11086023               | chr19 | 16089568 | T/C              | 2.53   | 3.5E-11 | 2.60   | 7.4E-11 |
| rs57843631               | chr19 | 16095202 | T/C              | -14.61 | 8.2E-30 | -14.64 | 1.2E-27 |
| rs34353978, rs397859699  | chr19 | 17053576 | A/AG             | -0.98  | 0.022   | -1.11  | 0.013   |
| rs59922977               | chr19 | 17141573 | TC/T             | 1.04   | 0.003   | 0.94   | 0.010   |
| rs6512220                | chr19 | 17732986 | C/T              | 1.06   | 0.002   | 0.92   | 0.011   |
| rs188247550              | chr19 | 19285807 | T/C              | -5.76  | 0.009   | -6.27  | 0.006   |
| rs7249692                | chr19 | 19559879 | T/C              | 1.50   | 5.2E-05 | 1.42   | 2.4E-04 |
| rs3841260                | chr19 | 19645264 | A/AGCC           | 3.37   | 1.9E-06 | 3.47   | 2.7E-06 |
| rs45522544               | chr19 | 19654690 | T/C              | 10.12  | 2.8E-05 | 10.99  | 1.4E-05 |
| rs117137505              | chr19 | 20179339 | T/G              | 9.01   | 0.018   | 9.51   | 0.015   |
| rs10402931               | chr19 | 32581163 | G/A              | -1.07  | 0.003   | -1.16  | 0.003   |
| rs12975577               | chr19 | 33264458 | T/C              | -1.02  | 0.003   | -1.01  | 0.005   |
| rs897764                 | chr19 | 35068720 | T/C              | -2.12  | 7.8E-04 | -1.97  | 0.003   |
| rs6510469                | chr19 | 35181105 | T/G              | -1.12  | 0.002   | -1.11  | 0.003   |
| rs2733737                | chr19 | 35554501 | T/C              | 0.72   | 0.046   | 0.90   | 0.017   |
| rs11668070               | chr19 | 38258273 | G/A              | -0.80  | 0.020   | -0.90  | 0.013   |
| rs12983010               | chr19 | 38738449 | G/A              | 3.31   | 8.5E-07 | 3.19   | 5.4E-06 |
| rs12721051               | chr19 | 44918903 | G/C              | -1.46  | 7.4E-04 | -1.25  | 0.006   |
| rs3803906                | chr19 | 45212718 | G/A              | -1.66  | 1.3E-05 | -1.93  | 1.2E-06 |
| rs73036520               | chr19 | 45246226 | C/G              | -3.67  | 2.3E-19 | -3.60  | 3.2E-17 |
| rs1005165                | chr19 | 45405792 | T/C              | -0.95  | 0.022   | -0.97  | 0.025   |

|                         |       |          |       |        |         |        |         |
|-------------------------|-------|----------|-------|--------|---------|--------|---------|
| rs59310453, rs796764477 | chr19 | 45812099 | AT/A  | 0.80   | 0.019   | 0.80   | 0.026   |
| rs3865444               | chr19 | 51224706 | A/C   | -1.58  | 1.2E-05 | -1.79  | 2.0E-06 |
| rs626283                | chr19 | 54173307 | C/G   | 1.46   | 2.8E-05 | 1.68   | 4.4E-06 |
| rs892090                | chr19 | 55027704 | T/G   | 1.03   | 0.027   | 1.21   | 0.013   |
| rs45541434              | chr19 | 55182101 | T/C   | -8.12  | 4.5E-10 | -7.56  | 3.2E-08 |
| rs147881000             | chr19 | 55186344 | A/G   | -11.08 | 0.009   | -12.85 | 0.003   |
| rs34548043              | chr19 | 58420528 | TA/T  | -1.22  | 4.2E-04 | -1.15  | 0.001   |
| rs190391173             | chr20 | 1488179  | C/T   | -53.10 | 1.3E-55 | -52.54 | 9.8E-50 |
| rs11906768              | chr20 | 1943420  | C/T   | -3.93  | 1.8E-24 | -3.93  | 1.5E-22 |
| rs6055955               | chr20 | 8623534  | C/T   | 1.23   | 3.4E-04 | 1.07   | 0.003   |
| rs80054178              | chr20 | 31706879 | C/T   | 8.43   | 1.3E-16 | 9.11   | 1.0E-17 |
| rs6060986               | chr20 | 31838494 | A/G   | -1.61  | 1.5E-05 | -1.84  | 2.3E-06 |
| rs4812447               | chr20 | 40643980 | G/A   | 0.77   | 0.026   | 0.75   | 0.038   |
| rs6103669               | chr20 | 44188205 | A/G   | -0.95  | 0.012   | -1.27  | 0.001   |
| rs7265567               | chr20 | 50471092 | T/C   | 1.05   | 0.005   | 1.17   | 0.003   |
| rs55708816              | chr20 | 56415068 | A/G   | 1.56   | 0.006   | 1.46   | 0.015   |
| rs463312                | chr20 | 59022915 | C/A   | -5.22  | 4.4E-12 | -5.75  | 2.6E-13 |
| rs11471957              | chr20 | 59023277 | CAA/C | 2.33   | 1.3E-08 | 2.59   | 1.7E-09 |
| rs4812056               | chr20 | 59098895 | C/A   | 1.63   | 5.5E-05 | 1.81   | 2.0E-05 |
| rs4809330               | chr20 | 63718234 | A/G   | -0.79  | 0.027   | -0.55  | 0.140   |
| rs2142218               | chr21 | 15059123 | C/T   | -0.99  | 0.028   | -0.76  | 0.105   |
| rs2070513               | chr21 | 33981573 | T/G   | 0.72   | 0.049   | 0.79   | 0.039   |
| rs111527738             | chr21 | 34887027 | G/A   | -3.51  | 0.018   | -3.40  | 0.028   |
| rs2242892               | chr21 | 35023677 | A/G   | -2.95  | 4.2E-06 | -3.21  | 1.7E-06 |
| rs75967349              | chr21 | 35028144 | G/C   | -2.70  | 0.001   | -2.96  | 6.5E-04 |
| rs7280028               | chr21 | 35044543 | C/T   | -0.91  | 0.032   | -0.87  | 0.050   |
| rs17285189              | chr21 | 38474017 | T/G   | 2.04   | 4.7E-05 | 1.95   | 1.9E-04 |
| rs9974653               | chr21 | 39369920 | C/A   | -1.06  | 0.005   | -1.16  | 0.003   |
| rs183393610             | chr22 | 17769676 | A/G   | 3.78   | 0.030   | 3.93   | 0.031   |
| rs1059196               | chr22 | 19724571 | T/C   | -1.67  | 3.0E-06 | -1.67  | 7.7E-06 |
| rs2238784               | chr22 | 19985036 | A/G   | 1.67   | 5.5E-06 | 1.63   | 1.9E-05 |
| rs45462093              | chr22 | 27791408 | G/A   | 1.58   | 1.5E-04 | 1.51   | 5.0E-04 |
| rs5763928               | chr22 | 30282541 | G/A   | -1.90  | 3.0E-06 | -2.03  | 1.7E-06 |
| rs855791                | chr22 | 37066896 | A/G   | 1.33   | 1.4E-04 | 1.45   | 7.6E-05 |
| rs2013837               | chr22 | 38875612 | G/A   | 0.97   | 0.005   | 1.16   | 0.001   |
| rs5758880               | chr22 | 42704850 | T/C   | 0.97   | 0.009   | 0.86   | 0.026   |
| rs1883314               | chr22 | 42978801 | G/C   | 1.81   | 1.6E-07 | 1.87   | 2.1E-07 |
| rs738409                | chr22 | 43928847 | G/C   | -1.68  | 3.6E-05 | -1.67  | 8.7E-05 |
| rs61431587              | chr22 | 49766569 | G/T   | 1.26   | 0.050   | 1.33   | 0.047   |
| rs75107793              | chr22 | 50190508 | A/G   | 7.02   | 4.3E-33 | 6.73   | 5.0E-28 |
| rs73187269              | chr22 | 50224992 | T/C   | -2.59  | 6.4E-08 | -2.66  | 1.2E-07 |
| rs8138438               | chr22 | 50642329 | G/A   | 0.98   | 0.005   | 0.99   | 0.007   |

**Plot** showing effects of the 577 PLT variants expressed as platelet count (PLT, in  $N \times 10^3/\mu l$ ) with 95% confidence intervals, in data including both genotyped and familially imputed Icelanders (x-axis) vs. only genotyped Icelanders (y-axis).

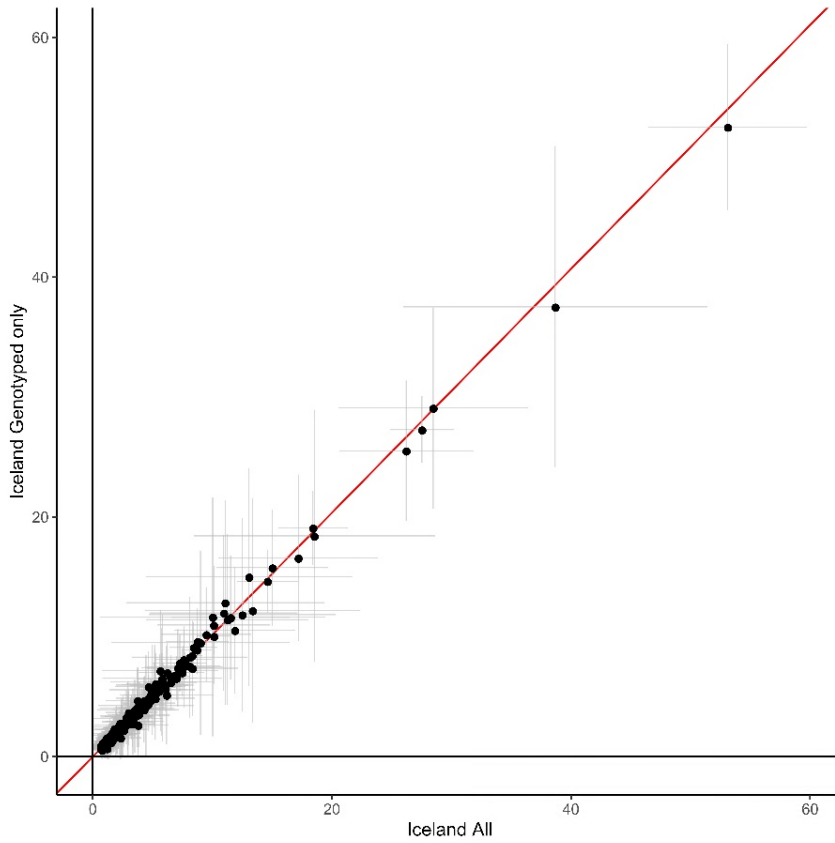

4. The author use the meta-analysis results to calculate the PLT PRS- additional details are warranted here. How good is the PLT PRS? AUC? What is the correlation between PLT and PLT PRS?

A: We did not use the meta-analysis results to calculate the PLT-PRS. To avoid overfitting due to sample overlap, we used the PRS GWAS for Iceland to create the PLT-PRS in the UKB dataset, and the PRS GWAS for UKB to calculate the PLT-PRS for the Icelandic dataset (described in the **Methods** section). The resulting PLT-PRSs explain 11.9% and 10.9% of the variance in the Icelandic and UKB datasets respectively.

The variance explained for the different models (fraction of causal variants) that we tested in LDpred is presented in the table below and has been added as **Supplementary Table 24**.

**Fraction of variance of PLT measurements explained by PLT-PRS scores created based on different re-weighting models in LDpred.**

| <b>Model<sup>a</sup></b> | <b>UKB</b> | <b>Iceland</b> |
|--------------------------|------------|----------------|
| Unweighted               | 4.4%       | 7.5%           |
| 1                        | 6.0%       | 9.2%           |
| 0.3                      | 7.1%       | 7.6%           |
| 0.1                      | 9.0%       | 6.1%           |
| 0.03                     | 10.9%      | 5.5%           |
| 0.01                     | 3.2%       | 5.4%           |
| 0.003                    | 1.5%       | 3.9%           |
| 0.001                    | 1.5%       | 4.2%           |
| Infinitesimal            | 7.5%       | 11.9%          |

<sup>a</sup>Assumed fraction of causal variants in the LDpred model used.

5. The authors identified 24 traits that are correlated with PLT PRS, how does this compare with the phenotypic correlation with the original measured PLT?

A: The table below presents results of the phenotype correlation between PLT measurements and the 24 traits in the UKB dataset, for which we have more complete and unbiased phenotype information and which is larger and hence better powered. For comparison we have repeated the phenotype correlation test using PLT measurement adjusted for the PLT-PRS to remove some of the genetic factor (See Major Comment 7).

The phenotype correlation between the 24 traits and PLT measurements on the one hand and PLT measurements adjusted for the PLT PRS on the other hand, in the UKB dataset.

| Trait                  | Platelet measurements UK |            |       | Platelet measurements adjusted for PLT-PRS UK |            |       |
|------------------------|--------------------------|------------|-------|-----------------------------------------------|------------|-------|
|                        | Beta                     | P          | R2    | Beta                                          | P          | R2    |
| Ankylosing spondylitis | 0.0047                   | 1.3E-27    | 0.009 | 0.0042                                        | 3.4E-19    | 0.006 |
| Hypertension           | 0.0012                   | 2.8E-65    | 0.001 | 0.0012                                        | 6.0E-61    | 0.001 |
| RA                     | 0.0034                   | 1.6E-51    | 0.005 | 0.0033                                        | 9.6E-44    | 0.004 |
| MPN                    | 0.0125                   | 1.4E-214   | 0.147 | 0.0127                                        | 2.7E-212   | 0.145 |
| BPH                    | -0.0004                  | 0.0003     | 0.000 | -0.0007                                       | 2.6E-08    | 0.000 |
| MPV                    | -0.0082                  | 4.3e-25333 | 0.227 | -0.0080                                       | 2.3e-20449 | 0.191 |
| WBC                    | 0.0048                   | 1.5e-7301  | 0.078 | 0.0048                                        | 1.3e-6606  | 0.071 |
| Lymphocyte count       | 0.0029                   | 9.0e-2517  | 0.028 | 0.0028                                        | 2.36e-2133 | 0.024 |
| Basophil count         | 0.0018                   | 1.4e-1096  | 0.011 | 0.0019                                        | 2.4e-1036  | 0.010 |
| Eosinophil count       | 0.0019                   | 6.2e-1157  | 0.013 | 0.0018                                        | 3.6e-885   | 0.010 |
| Monocyte count         | 0.0027                   | 7.7e-2231  | 0.025 | 0.0026                                        | 2.6e-1881  | 0.021 |
| Neutrophil count       | 0.0043                   | 1.5e-5695  | 0.062 | 0.0044                                        | 4.3e-5343  | 0.058 |
| Triglycerides          | 0.0015                   | 3.9e-632   | 0.008 | 0.0015                                        | 1.2e-600   | 0.007 |
| Total cholesterol      | 0.0015                   | 2.8e-662   | 0.008 | 0.0016                                        | 1.5e-672   | 0.008 |
| Non-HDL cholesterol    | 0.0017                   | 1.8e-764   | 0.010 | 0.0018                                        | 3.6e-781   | 0.010 |
| Heart rate             | 0.0023                   | 6.5e-1522  | 0.018 | 0.0025                                        | 9.7e-1579  | 0.019 |
| Mean arterial pressure | 0.0011                   | 1.9e-347   | 0.004 | 0.0012                                        | 1.7e-340   | 0.004 |
| GGTP                   | 0.0013                   | 7.1e-450   | 0.005 | 0.0012                                        | 2.5e-377   | 0.005 |
| AP                     | 0.0017                   | 1.1e-794   | 0.010 | 0.0017                                        | 3.8e-779   | 0.009 |
| Bilirubin              | -0.0028                  | 9.3e-2290  | 0.027 | -0.0031                                       | 4.4e-2421  | 0.028 |
| CRP                    | 0.0027                   | 2.1e-2035  | 0.024 | 0.0028                                        | 1.1e-2093  | 0.025 |
| Creatinine             | -0.0009                  | 2.3E-236   | 0.003 | -0.0009                                       | 1.9E-221   | 0.003 |
| Height                 | -0.0016                  | 3.3e-776   | 0.009 | -0.0016                                       | 3.1e-662   | 0.008 |
| Weight                 | 0.0000                   | 0.38       | 0.000 | 0.0001                                        | 0.0011     | 0.000 |

6. Given the likely high correlation of phenotypes, this portion of the study would be better powered if significance was achieved through permutation, rather than using bonferonni for multiple test corrections.

A: As there is extensive correlation both between the genetic variants and the study individuals that are related, in particular in the Icelandic dataset but also to some extent in the UK Biobank dataset, permutation test would not be valid.

7. The authors also ran the single variant association test for the 577 PLT SNPs on the identified 24 traits. It would be interesting to also run the regression adjusting the original PLT measures in order to see the genetic effect separately from the phenotypic correlation.

A: See Major Comment 5 and the table in our response to that comment where we present phenotype correlation of PLT measurements with the 24 traits in the UKB dataset and a separate result for the PLT measurements adjusted for the PLT-PRS . We caution though

that the PLT-PRS only captures a part of the genetic factor (in the UKB dataset it explains 10.9% of the PLT variance), hence these results will not prove a good estimate of the phenotypic correlation in the absence of genetic factors.

8. Although authors state there is not significant heterogeneity in Icelander and UK Biobank, some p values are large in Icelanders but small in UK Biobank (UKB). For example, rs964184 (supplementary table 2) has p value of 1.9E-3 in Icelander and 1.8E-25 in UKB. Are such significant meta-analysis results driven by UKB data?

A: The effective sample size of the UKB PLT dataset is much larger than for the Icelandic PLT dataset as can be seen from the association results for the two dataset. Although the Icelandic dataset includes 270,211 individuals, about half of them are not genotyped directly and they do not contribute much to the statistical power (as is shown in response to Major Comment 3 above). And as the genotyped Icelandic individuals are very related, 139,479 individuals correspond to about 1/3 of the Icelandic population, and the effective sample size is much less than the number of genotyped individuals would indicate. This is reflected in a large genotypic inflation factor for the Icelandic genotyped individuals (PLT- $\lambda_{gc}$ = 2.65). In contrast the UKB PLT dataset includes 397,495 mostly unrelated individuals (for UKB PLT- $\lambda_{gc}$  = 1.51). So it is fair to say that association results are mostly driven by the UKB dataset. However, even though the P values are much less significant for the Icelandic dataset, the effect estimates between the Icelandic and UKB results are consistent as can be seen the heterogeneity test presented in Supplementary table 2 in the  $P_{het}$  column.

9. The authors should provide figures demonstrating that their test statistics are behaving appropriately given the complex relatedness structures and genotype imputation procedures which may introduce bias- the correction factor for case-control phenotypes which were found to correlate with the PLT PRS are given, but it would be useful to have more information about any inflation seen in the primary GWAS/Meta analyses.

A: The plots below show the excess of real signals with large  $\chi^2$  values in the datasets, especially in the UKB dataset. But for lower  $\chi^2$  values the statistics look well calibrated although slightly conservative for the Icelandic dataset. We have added the estimated correction factors for the QT phenotypes to **Supplementary Table 23**. The qq-plots are now included as **Supplementary Figure 3**. The corresponding clarifications have now been added to the text (lines 450-452) and sound as following: The estimated correction factors for the phenotypes, which were found to correlate with the PLT PRS, are shown in **Supplementary Table 23**. The Q-Q plots are presented in **Supplementary Figure 3**.



**Q-Q plots** of the genome-wide association results. A) A Q-Q plot of the adjusted Chi<sup>2</sup>-statistics for association with PLT values for all tested variants for the UK Biobank (red dots) and the Icelandic (blue dots) datasets, respectively. The equiangular line (green line) is included in the plot for reference purpose. B) A subset of Figure A) showing the Q-Q plot for variants with low Chi<sup>2</sup> values.

A)

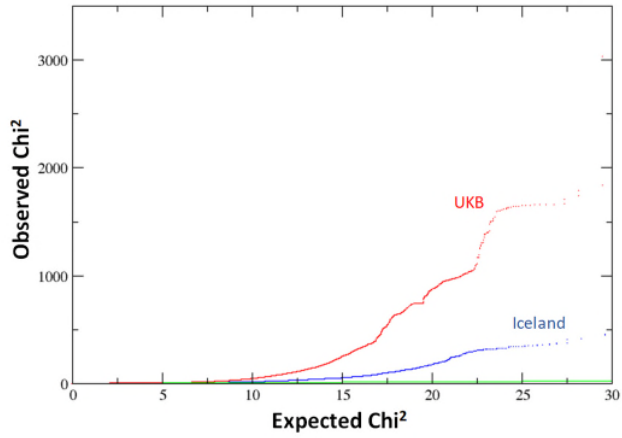

B)

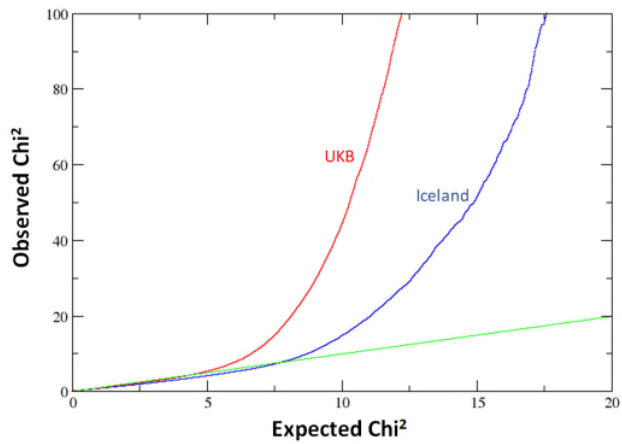

Minor comments:

1. Filtering criteria of imputation information over 0.8 and 0.7 were applied to Iceland and UK Biobank dataset respectively. What is the effect of these differing thresholds on low MAF (< 1~2%) in Iceland data?

A: There are about 0.66 million variants in the Icelandic data with imputation info in the range 0.7 to 0.8, and with minor allele frequency of 1-2%.

2. The 4 novel PLT loci, should be better highlighted and specifically described. Did any of these show compelling associations with related traits?

A: Please refer to our response to Comment 3 by Reviewer 2.

3. IPA method is a bit of a black box (disclosure- I'm not a fan of this method, but am trying to set aside my bias here) and provides a network association rather than real causality. A formal causality test would be appropriate and potentially informative for the highlighted networks of interest.

A: It is not unusual to be skeptical towards IPA, but upon close acquaintance with its methodology and available features it becomes much less of a black box and can be very helpful in providing biological insights into data (especially into expression data). Causality is not claimed, instead it helps to gain insight into how differential expression of genes in our dataset can potentially lead to outcomes, for which we identified associations in other parts of our study. Since we aimed at trying to understand biological mechanisms and pathways through which the identified PLT loci could affect platelet count, it was a reasonable approach, complementary to other parts of the study and turned out to be supportive of our findings from e.g. the PLT PRS association part.



REVIEWERS' COMMENTS:

Reviewer #2 (Remarks to the Author):

The authors have provided a thorough and detailed response and I believe they adequately met the review comments provided.

I also complement the authors on making their PRS available, and the results available on their DeCode site to enable future scientific endeavors.

Reviewer #3 (Remarks to the Author):

The authors should be commended on a highly responsive revision.

I have only two minor points:

1. The concern regarding variant quality filtering is why filter two datasets using different imputation qualities (0.8 for Iceland and 0.7 for UKB)? This approach could lead to loss of variants with low MAF in Icelandic dataset, since often less frequent variants have lower imputation quality.
2. The sensitivity analysis plot on p.32 is great and it should be included in supplementary materials.
